# Supplementary material for: Identifying the source rookery of green turtles (Chelonia mydas) found in feeding grounds around the Korean Peninsula
Source: PeerJ. 2024 Jun 20;12:e17560. doi: 10.7717/peerj.17560 (PMC11193967; doi:10.7717/peerj.17560)
Supplement: Supplemental Information 1 [file peerj-12-17560-s001.xlsx]

## Sheet: Table S1_Sample
Table S1. Samples of the 40 green turtles (Chelonia mydas) used in the study
No.	Voucher Number	Sex	Maturity	Carapace length (mm)	Body weight (g)	Sampled year	Sampled month	Sampled season	Specific feeding ground	Haplotype	Acession number	Sequence (796 bp)
1	MABIK AR00000034		Juvenile	472	10200	2014	8	Summer	Jeju Sea	Cmp39.1	PP691472	CCCCAAAACCGGAATCCTATAATTAAACTATCCTTTGACACAGGAATAAAAGTGTCC-ACGCACAAACTAACTACCTAAATTCTCTGCCGTGCCCAACAGAACAATACCCACAATACCTATCTATGTATTATTGTACATCTACTTATTTACCACTAGCATATGACCAGTAATGTTAACAGTTGATTTGGCCCTAAACAT-AAAAATTATTAAATTTG-CATAAAATATTTTAATAACATGAATATTAAGCAGAGAGTTAAAAGTGAAATGATATAGGACATAAAATTAAACCATTATACTCAACCATGAATATTGTCACAGTAATTGGTTATTTCTTAA-ATAGCTATTCACGAGAAATAAGCAACCCTTGTTAGTAAGATACAACATTACCAGTTTCA…
2	KOR0002					2015	7	Summer	South Sea	CmP39.1	PP691472	CCCCAAAACCGGAATCCTATAATTAAACTATCCTTTGACACAGGAATAAAAGTGTCC-ACGCACAAACTAACTACCTAAATTCTCTGCCGTGCCCAACAGAACAATACCCACAATACCTATCTATGTATTATTGTACATCTACTTATTTACCACTAGCATATGACCAGTAATGTTAACAGTTGATTTGGCCCTAAACAT-AAAAATTATTAAATTTG-CATAAAATATTTTAATAACATGAATATTAAGCAGAGAGTTAAAAGTGAAATGATATAGGACATAAAATTAAACCATTATACTCAACCATGAATATTGTCACAGTAATTGGTTATTTCTTAA-ATAGCTATTCACGAGAAATAAGCAACCCTTGTTAGTAAGATACAACATTACCAGTTTCA…
3	MABIK AR00000035		Juvenile	433	8850	2016	7	Summer	Jeju Sea	Cmp53.1	PP691475	CCCCAAAACCGGAATCCTACAATTAAACTATCCTTTGACACAGG---AAAAGTGTCC-ACGCACAAACTAACTACCTAAATTCTCTGCCGTGCCCAACAGAACAATACCCACAATACCTATCTATGTATTATTGTACATCTACTTATTTACCACTAGCATATGACCAGTAATGTTAACAGTTGATTTGGCCCTAAACAT-GAAAATTATTGAATCCA-CAT-AAATATTTTAATAACATGAATATTAAGCAGAGAATTAAAAGTGAAATGATATAGGACATAAAATTAAACCATTATACTCAACCATGAATATCGTCACAGTAATTGGTTATTTCTTAA-GTAGCTATTCACGAGAAATAAGCAACCCTTGTTAGTAAGATACAACATTACCAGTTTCA…
4	KOR0003	Female	Adult	704		2016	8	Summer	Jeju Sea	CmP127.1	PP691480	CCCCAAAACCGGAATCCTATAATTAAACTATCCTTTGACACAGGAATAAAAGTGTCC-ACGCACAAACTAACTACCTAAATTCTCTGCCGTGCCCAACAGAACAATACCCACAATACCTATCTATGTATTATTGTACATCTACTTATTTACCACTAGCATATGACCAGTAATGTTAACAGTTGATTTGGCCCTAAACAT-AAAAATTATTAAATTTG-CATAAAATATTTTAATAACATGAATATTAAGCAGAGAATTAAAAGTGAAATGATATAGGACATAAAATTAAACCATTATACTCAACCATGAATATTGTCACAGTAATTGGTTATTTCTTAA-ATAGCTATTCACGAGAAATAAGCAACCCTTGTTAGTAAGATACAACATTACCAGTTTCA…
5	KOR0004		Juvenile	690		2016	8	Summer	Jeju Sea	CmP128.1	PP691481	CCCCAAAACCGGAATCCTATAATTAAACTATCCTTTGACACAGGAATAAAAGTGTCC-ACGCACAAACTAACTACCTAAATTCTCTGCCGTGCCCAACAGAACAATACCCACAATACCTATCTATGTATTATTGTACATCTACTTATTTACCACTAGCATATGACCAGTAATGTTAACAGTTGATTTGGCCCTAAACAT-AAAAATTATTAAATTTG-CATAAAATATTTTAATAACATGAATATTAAGCAGAGAGTTAAAAGTGAAATGATATGGGACATAAAATTAAACCATTATACTCAACCATGAATATTGTCACAGTAATTGGTTATTTCTTAA-ATAGCTATTCACGAGAAATAAGCAACCCTTGTTAGTAAGATACAACATTACCAGTTTCA…
6	KOR0005	Male	Adult	820		2016	9	Autumn	East Sea	CmP121.1	PP691479	CCCCAAAACCGGAATCCTATAATTAAACTATCCTTTGACACAGGAATAAAAGTGTCC-ACGCACAAACTAACTACCTAAATTCTCTGCCGTGCCCAACAGAACAATACCCACAATACCTATCTATGTATTATTGTACATCTACTTATTTACCACTAGCATATGACCAGTAATGTTAACAGTTGATTTGGCCCTAAACAT-AAAAATTATTAAATTTG-CATAAAATATTTTAATAACATGAATATTAAGCAGAGAGTTAAAAGTGAAATGATATAGGACATAAAATTAAACCATTATACTCAACCATGAATATTGTCACAGTAATTGGTTATTTCTTAA-ATAGCTATTCACGAGAAATAAGCAACCCTTGTTAGTAAGATACAACATTACCAGTTTCA…
7	KOR0006		Adult	820	74000	2016	9	Autumn	South Sea	CmP121.1	PP691479	CCCCAAAACCGGAATCCTATAATTAAACTATCCTTTGACACAGGAATAAAAGTGTCC-ACGCACAAACTAACTACCTAAATTCTCTGCCGTGCCCAACAGAACAATACCCACAATACCTATCTATGTATTATTGTACATCTACTTATTTACCACTAGCATATGACCAGTAATGTTAACAGTTGATTTGGCCCTAAACAT-AAAAATTATTAAATTTG-CATAAAATATTTTAATAACATGAATATTAAGCAGAGAGTTAAAAGTGAAATGATATAGGACATAAAATTAAACCATTATACTCAACCATGAATATTGTCACAGTAATTGGTTATTTCTTAA-ATAGCTATTCACGAGAAATAAGCAACCCTTGTTAGTAAGATACAACATTACCAGTTTCA…
8	KOR0128	Female	Adult	820	55400	2017	6	Summer	South Sea	Cmp39.1	PP691472	CCCCAAAACCGGAATCCTATAATTAAACTATCCTTTGACACAGGAATAAAAGTGTCC-ACGCACAAACTAACTACCTAAATTCTCTGCCGTGCCCAACAGAACAATACCCACAATACCTATCTATGTATTATTGTACATCTACTTATTTACCACTAGCATATGACCAGTAATGTTAACAGTTGATTTGGCCCTAAACAT-AAAAATTATTAAATTTG-CATAAAATATTTTAATAACATGAATATTAAGCAGAGAGTTAAAAGTGAAATGATATAGGACATAAAATTAAACCATTATACTCAACCATGAATATTGTCACAGTAATTGGTTATTTCTTAA-ATAGCTATTCACGAGAAATAAGCAACCCTTGTTAGTAAGATACAACATTACCAGTTTCA…
9	MR_83_Cm	Female	Adult	839	60900	2017	8	Summer	East Sea	Cmp70.1	PP691477	CCCCAAAACCGGAATCCTATAATTAAACTATCCTTTGACACAGGAATAAAAGTGTCC-ACGCACAAACTAACTACCTAAATTCTCTGCCGTGCCCAACAGAACAATACCCACAATACCTATCTATGTATTATTGTACATCTACTTATTTACCACTAGCATATGACCAGTAATGTTAACAGTTGATTTGGCCCTAAACAT-AAAAATTATTAAATTTG-CATAAAATATTTTAATAACATGAATATTAAGCAGAGAATTAAAAGTGAAATGATATAGGACATAAAATTAAACCATTATACTCAACCATGAATATTGTCACAGTAATTGGTTATTTCTTAA-ATAGCTATTCACGAGAAATAAGCAACCCTTGTTAGTAAGATACAACATTACCAGTTTCA…
10	MR_81_Cm				57800	2017	8	Summer	East Sea	Cmp54.1	PP691476	CCCCAAAACCGGAATCCTATAATTAAACTATCCTTTGACACAGGAATAAAAGTGTCC-ACGCACAAAC----TACCTAAATTCTCTGCCGTGCCCAACAGAACAATACCCACAATACCTATCTATGTATTATTGTACATCTACTTATTTACCACTAGCATATGACCAGTAATGTTAACAGTTGATTTGGCCCTAAACAT-GAAAATTATTGAGTTTG-CAT-AAACATTTTAATAACATGAATATTAAGCAGAGAATTAAAAGTGAAATGATATAGGACATAAAATTAAACCATTATACTCAACCATGAATATTGTCACAGTAATTGGTTATTTCTTAA-ATAGCTATTCACGAGAAATAAGCAACCCTTGTTAGTAAGATACAACATTACCAGTTTCA…
11	KOR0009	Female	Adult	788		2017	9	Autumn	South Sea	CmP39.1	PP691472	CCCCAAAACCGGAATCCTATAATTAAACTATCCTTTGACACAGGAATAAAAGTGTCC-ACGCACAAACTAACTACCTAAATTCTCTGCCGTGCCCAACAGAACAATACCCACAATACCTATCTATGTATTATTGTACATCTACTTATTTACCACTAGCATATGACCAGTAATGTTAACAGTTGATTTGGCCCTAAACAT-AAAAATTATTAAATTTG-CATAAAATATTTTAATAACATGAATATTAAGCAGAGAGTTAAAAGTGAAATGATATAGGACATAAAATTAAACCATTATACTCAACCATGAATATTGTCACAGTAATTGGTTATTTCTTAA-ATAGCTATTCACGAGAAATAAGCAACCCTTGTTAGTAAGATACAACATTACCAGTTTCA…
12	MABIK AR00000015	Female	Adult	850	70500	2017	10	Autumn	East Sea	Cmp50.1	PP691474	CCCCAAAACCGGAATCCTACAATTAAACTATCCTTTGACACAGG---AAAAGTGTCC-ACGCACAAACTAACTACCTAAATTCTCTGCCGTGCCCAACAGAACAATACCCACAATACCTATCTATGTATTATTGTACATCTACTTATTTACCACTAGCATATGACCAGTAATGTTAACAGTTGATTTGGCCCTAAACAT-GAAAATTATTGAATCCA-CAT-AAATATTTTAATAACATGAATGTTAAGCAGAGAATTAAAAGTGAAATGATATAGGACATAAAATTAAACCATTATACTCAACCATGAATATCGTCACAGTAATTGGTTATTTCTTAA-GTAGCTATTCACGAGAAATAAGCAACCCTTGTTAGTAAGATACAACATTACCAGTTTCA…
13	MABIK AR00000021	Female	Adult	794	52800	2017	10	Autumn	East Sea	Cmp50.1	PP691474	CCCCAAAACCGGAATCCTACAATTAAACTATCCTTTGACACAGG---AAAAGTGTCC-ACGCACAAACTAACTACCTAAATTCTCTGCCGTGCCCAACAGAACAATACCCACAATACCTATCTATGTATTATTGTACATCTACTTATTTACCACTAGCATATGACCAGTAATGTTAACAGTTGATTTGGCCCTAAACAT-GAAAATTATTGAATCCA-CAT-AAATATTTTAATAACATGAATGTTAAGCAGAGAATTAAAAGTGAAATGATATAGGACATAAAATTAAACCATTATACTCAACCATGAATATCGTCACAGTAATTGGTTATTTCTTAA-GTAGCTATTCACGAGAAATAAGCAACCCTTGTTAGTAAGATACAACATTACCAGTTTCA…
14	MABIK AR00000025	Female	Adult	748		2017	12	Winter	East Sea	CmP127.1	PP691480	CCCCAAAACCGGAATCCTATAATTAAACTATCCTTTGACACAGGAATAAAAGTGTCC-ACGCACAAACTAACTACCTAAATTCTCTGCCGTGCCCAACAGAACAATACCCACAATACCTATCTATGTATTATTGTACATCTACTTATTTACCACTAGCATATGACCAGTAATGTTAACAGTTGATTTGGCCCTAAACAT-AAAAATTATTAAATTTG-CATAAAATATTTTAATAACATGAATATTAAGCAGAGAATTAAAAGTGAAATGATATAGGACATAAAATTAAACCATTATACTCAACCATGAATATTGTCACAGTAATTGGTTATTTCTTAA-ATAGCTATTCACGAGAAATAAGCAACCCTTGTTAGTAAGATACAACATTACCAGTTTCA…
15	MABIK AR00000037	Female	Adult	805		2018	8	Summer	East Sea	Cmp39.1	PP691472	CCCCAAAACCGGAATCCTATAATTAAACTATCCTTTGACACAGGAATAAAAGTGTCC-ACGCACAAACTAACTACCTAAATTCTCTGCCGTGCCCAACAGAACAATACCCACAATACCTATCTATGTATTATTGTACATCTACTTATTTACCACTAGCATATGACCAGTAATGTTAACAGTTGATTTGGCCCTAAACAT-AAAAATTATTAAATTTG-CATAAAATATTTTAATAACATGAATATTAAGCAGAGAGTTAAAAGTGAAATGATATAGGACATAAAATTAAACCATTATACTCAACCATGAATATTGTCACAGTAATTGGTTATTTCTTAA-ATAGCTATTCACGAGAAATAAGCAACCCTTGTTAGTAAGATACAACATTACCAGTTTCA…
16	MABIK AR00000036	Female	Adult	800	52450	2018	8	Summer	East Sea	Cmp39.1	PP691472	CCCCAAAACCGGAATCCTATAATTAAACTATCCTTTGACACAGGAATAAAAGTGTCC-ACGCACAAACTAACTACCTAAATTCTCTGCCGTGCCCAACAGAACAATACCCACAATACCTATCTATGTATTATTGTACATCTACTTATTTACCACTAGCATATGACCAGTAATGTTAACAGTTGATTTGGCCCTAAACAT-AAAAATTATTAAATTTG-CATAAAATATTTTAATAACATGAATATTAAGCAGAGAGTTAAAAGTGAAATGATATAGGACATAAAATTAAACCATTATACTCAACCATGAATATTGTCACAGTAATTGGTTATTTCTTAA-ATAGCTATTCACGAGAAATAAGCAACCCTTGTTAGTAAGATACAACATTACCAGTTTCA…
17	KOR0154	Female	Adult	790	75800	2018	8	Summer	South Sea	CmP50.1	PP691474	CCCCAAAACCGGAATCCTACAATTAAACTATCCTTTGACACAGG---AAAAGTGTCC-ACGCACAAACTAACTACCTAAATTCTCTGCCGTGCCCAACAGAACAATACCCACAATACCTATCTATGTATTATTGTACATCTACTTATTTACCACTAGCATATGACCAGTAATGTTAACAGTTGATTTGGCCCTAAACAT-GAAAATTATTGAATCCA-CAT-AAATATTTTAATAACATGAATGTTAAGCAGAGAATTAAAAGTGAAATGATATAGGACATAAAATTAAACCATTATACTCAACCATGAATATCGTCACAGTAATTGGTTATTTCTTAA-GTAGCTATTCACGAGAAATAAGCAACCCTTGTTAGTAAGATACAACATTACCAGTTTCA…
18	MABIK AR00000044		Juvenile	460	11900	2018	10	Autumn	South Sea	Cmp50.1	PP691474	CCCCAAAACCGGAATCCTACAATTAAACTATCCTTTGACACAGG---AAAAGTGTCC-ACGCACAAACTAACTACCTAAATTCTCTGCCGTGCCCAACAGAACAATACCCACAATACCTATCTATGTATTATTGTACATCTACTTATTTACCACTAGCATATGACCAGTAATGTTAACAGTTGATTTGGCCCTAAACAT-GAAAATTATTGAATCCA-CAT-AAATATTTTAATAACATGAATGTTAAGCAGAGAATTAAAAGTGAAATGATATAGGACATAAAATTAAACCATTATACTCAACCATGAATATCGTCACAGTAATTGGTTATTTCTTAA-GTAGCTATTCACGAGAAATAAGCAACCCTTGTTAGTAAGATACAACATTACCAGTTTCA…
19	KOR0105	Female	Adult	776	69800	2018	10	Autumn	South Sea	Cmp39.1	PP691472	CCCCAAAACCGGAATCCTATAATTAAACTATCCTTTGACACAGGAATAAAAGTGTCC-ACGCACAAACTAACTACCTAAATTCTCTGCCGTGCCCAACAGAACAATACCCACAATACCTATCTATGTATTATTGTACATCTACTTATTTACCACTAGCATATGACCAGTAATGTTAACAGTTGATTTGGCCCTAAACAT-AAAAATTATTAAATTTG-CATAAAATATTTTAATAACATGAATATTAAGCAGAGAGTTAAAAGTGAAATGATATAGGACATAAAATTAAACCATTATACTCAACCATGAATATTGTCACAGTAATTGGTTATTTCTTAA-ATAGCTATTCACGAGAAATAAGCAACCCTTGTTAGTAAGATACAACATTACCAGTTTCA…
20	MABIK AR00000041		Juvenile	460	62000	2018	10	Autumn	West (Yellow) Sea	Cmp53.1	PP691475	CCCCAAAACCGGAATCCTACAATTAAACTATCCTTTGACACAGG---AAAAGTGTCC-ACGCACAAACTAACTACCTAAATTCTCTGCCGTGCCCAACAGAACAATACCCACAATACCTATCTATGTATTATTGTACATCTACTTATTTACCACTAGCATATGACCAGTAATGTTAACAGTTGATTTGGCCCTAAACAT-GAAAATTATTGAATCCA-CAT-AAATATTTTAATAACATGAATATTAAGCAGAGAATTAAAAGTGAAATGATATAGGACATAAAATTAAACCATTATACTCAACCATGAATATCGTCACAGTAATTGGTTATTTCTTAA-GTAGCTATTCACGAGAAATAAGCAACCCTTGTTAGTAAGATACAACATTACCAGTTTCA…
21	MR_79_Cm	Female	Adult	828	59700	2019	3	Spring	Jeju Sea	Cmp39.1	PP691472	CCCCAAAACCGGAATCCTATAATTAAACTATCCTTTGACACAGGAATAAAAGTGTCC-ACGCACAAACTAACTACCTAAATTCTCTGCCGTGCCCAACAGAACAATACCCACAATACCTATCTATGTATTATTGTACATCTACTTATTTACCACTAGCATATGACCAGTAATGTTAACAGTTGATTTGGCCCTAAACAT-AAAAATTATTAAATTTG-CATAAAATATTTTAATAACATGAATATTAAGCAGAGAGTTAAAAGTGAAATGATATAGGACATAAAATTAAACCATTATACTCAACCATGAATATTGTCACAGTAATTGGTTATTTCTTAA-ATAGCTATTCACGAGAAATAAGCAACCCTTGTTAGTAAGATACAACATTACCAGTTTCA…
22	MR_86_Cm	Female	Adult	794	53500	2019	7	Summer	South Sea	Cmp39.1	PP691472	CCCCAAAACCGGAATCCTATAATTAAACTATCCTTTGACACAGGAATAAAAGTGTCC-ACGCACAAACTAACTACCTAAATTCTCTGCCGTGCCCAACAGAACAATACCCACAATACCTATCTATGTATTATTGTACATCTACTTATTTACCACTAGCATATGACCAGTAATGTTAACAGTTGATTTGGCCCTAAACAT-AAAAATTATTAAATTTG-CATAAAATATTTTAATAACATGAATATTAAGCAGAGAGTTAAAAGTGAAATGATATAGGACATAAAATTAAACCATTATACTCAACCATGAATATTGTCACAGTAATTGGTTATTTCTTAA-ATAGCTATTCACGAGAAATAAGCAACCCTTGTTAGTAAGATACAACATTACCAGTTTCA…
23	KOR0129	Female	Adult	773	70900	2019	7	Summer	South Sea	Cmp39.1	PP691472	CCCCAAAACCGGAATCCTATAATTAAACTATCCTTTGACACAGGAATAAAAGTGTCC-ACGCACAAACTAACTACCTAAATTCTCTGCCGTGCCCAACAGAACAATACCCACAATACCTATCTATGTATTATTGTACATCTACTTATTTACCACTAGCATATGACCAGTAATGTTAACAGTTGATTTGGCCCTAAACAT-AAAAATTATTAAATTTG-CATAAAATATTTTAATAACATGAATATTAAGCAGAGAGTTAAAAGTGAAATGATATAGGACATAAAATTAAACCATTATACTCAACCATGAATATTGTCACAGTAATTGGTTATTTCTTAA-ATAGCTATTCACGAGAAATAAGCAACCCTTGTTAGTAAGATACAACATTACCAGTTTCA…
24	MR_88_Cm	Female	Adult	740	18000	2019	8	Summer	East Sea	Cmp39.1	PP691472	CCCCAAAACCGGAATCCTATAATTAAACTATCCTTTGACACAGGAATAAAAGTGTCC-ACGCACAAACTAACTACCTAAATTCTCTGCCGTGCCCAACAGAACAATACCCACAATACCTATCTATGTATTATTGTACATCTACTTATTTACCACTAGCATATGACCAGTAATGTTAACAGTTGATTTGGCCCTAAACAT-AAAAATTATTAAATTTG-CATAAAATATTTTAATAACATGAATATTAAGCAGAGAGTTAAAAGTGAAATGATATAGGACATAAAATTAAACCATTATACTCAACCATGAATATTGTCACAGTAATTGGTTATTTCTTAA-ATAGCTATTCACGAGAAATAAGCAACCCTTGTTAGTAAGATACAACATTACCAGTTTCA…
25	MR_89_Cm	Female	Adult	810	55000	2019	9	Autumn	South Sea	Cmp39.1	PP691472	CCCCAAAACCGGAATCCTATAATTAAACTATCCTTTGACACAGGAATAAAAGTGTCC-ACGCACAAACTAACTACCTAAATTCTCTGCCGTGCCCAACAGAACAATACCCACAATACCTATCTATGTATTATTGTACATCTACTTATTTACCACTAGCATATGACCAGTAATGTTAACAGTTGATTTGGCCCTAAACAT-AAAAATTATTAAATTTG-CATAAAATATTTTAATAACATGAATATTAAGCAGAGAGTTAAAAGTGAAATGATATAGGACATAAAATTAAACCATTATACTCAACCATGAATATTGTCACAGTAATTGGTTATTTCTTAA-ATAGCTATTCACGAGAAATAAGCAACCCTTGTTAGTAAGATACAACATTACCAGTTTCA…
26	MR_95_Cm	Female	Adult	1066	144000	2020	6	Summer	Jeju Sea	Cmp128.1	PP691481	CCCCAAAACCGGAATCCTATAATTAAACTATCCTTTGACACAGGAATAAAAGTGTCC-ACGCACAAACTAACTACCTAAATTCTCTGCCGTGCCCAACAGAACAATACCCACAATACCTATCTATGTATTATTGTACATCTACTTATTTACCACTAGCATATGACCAGTAATGTTAACAGTTGATTTGGCCCTAAACAT-AAAAATTATTAAATTTG-CATAAAATATTTTAATAACATGAATATTAAGCAGAGAGTTAAAAGTGAAATGATATGGGACATAAAATTAAACCATTATACTCAACCATGAATATTGTCACAGTAATTGGTTATTTCTTAA-ATAGCTATTCACGAGAAATAAGCAACCCTTGTTAGTAAGATACAACATTACCAGTTTCA…
27	KIOST_20_01_Cm		Juvenile	427	7700	2020	10	Autumn	South Sea	CmP39.1	PP691472	CCCCAAAACCGGAATCCTATAATTAAACTATCCTTTGACACAGGAATAAAAGTGTCC-ACGCACAAACTAACTACCTAAATTCTCTGCCGTGCCCAACAGAACAATACCCACAATACCTATCTATGTATTATTGTACATCTACTTATTTACCACTAGCATATGACCAGTAATGTTAACAGTTGATTTGGCCCTAAACAT-AAAAATTATTAAATTTG-CATAAAATATTTTAATAACATGAATATTAAGCAGAGAGTTAAAAGTGAAATGATATAGGACATAAAATTAAACCATTATACTCAACCATGAATATTGTCACAGTAATTGGTTATTTCTTAA-ATAGCTATTCACGAGAAATAAGCAACCCTTGTTAGTAAGATACAACATTACCAGTTTCA…
28	KIOST_22_08_Cm					2021	6	Summer	Jeju Sea	CmP121.1	PP691479	CCCCAAAACCGGAATCCTATAATTAAACTATCCTTTGACACAGGAATAAAAGTGTCC-ACGCACAAACTAACTACCTAAATTCTCTGCCGTGCCCAACAGAACAATACCCACAATACCTATCTATGTATTATTGTACATCTACTTATTTACCACTAGCATATGACCAGTAATGTTAACAGTTGATTTGGCCCTAAACAT-AAAAATTATTAAATTTG-CATAAAATATTTTAATAACATGAATATTAAGCAGAGAGTTAAAAGTGAAATGATATAGGACATAAAATTAAACCATTATACTCAACCATGAATATTGTCACAGTAATTGGTTATTTCTTAA-ATAGCTATTCACGAGAAATAAGCAACCCTTGTTAGTAAGATACAACATTACCAGTTTCA…
29	KIOST_22_10_Cm		Juvenile	560		2021	6	Summer	Jeju Sea	CmP39.1	PP691472	CCCCAAAACCGGAATCCTATAATTAAACTATCCTTTGACACAGGAATAAAAGTGTCC-ACGCACAAACTAACTACCTAAATTCTCTGCCGTGCCCAACAGAACAATACCCACAATACCTATCTATGTATTATTGTACATCTACTTATTTACCACTAGCATATGACCAGTAATGTTAACAGTTGATTTGGCCCTAAACAT-AAAAATTATTAAATTTG-CATAAAATATTTTAATAACATGAATATTAAGCAGAGAGTTAAAAGTGAAATGATATAGGACATAAAATTAAACCATTATACTCAACCATGAATATTGTCACAGTAATTGGTTATTTCTTAA-ATAGCTATTCACGAGAAATAAGCAACCCTTGTTAGTAAGATACAACATTACCAGTTTCA…
30	KIOST_21_03_Cm		Juvenile	395	7300	2021	7	Summer	East Sea	CmP128.1	PP691481	CCCCAAAACCGGAATCCTATAATTAAACTATCCTTTGACACAGGAATAAAAGTGTCC-ACGCACAAACTAACTACCTAAATTCTCTGCCGTGCCCAACAGAACAATACCCACAATACCTATCTATGTATTATTGTACATCTACTTATTTACCACTAGCATATGACCAGTAATGTTAACAGTTGATTTGGCCCTAAACAT-AAAAATTATTAAATTTG-CATAAAATATTTTAATAACATGAATATTAAGCAGAGAGTTAAAAGTGAAATGATATGGGACATAAAATTAAACCATTATACTCAACCATGAATATTGTCACAGTAATTGGTTATTTCTTAA-ATAGCTATTCACGAGAAATAAGCAACCCTTGTTAGTAAGATACAACATTACCAGTTTCA…
31	MR_104_Cc					2021	7	Summer	East Sea	CmP49.1	PP691473	CCCCAAAACCGGAATCCTACAATTAAACTATCCTTTGACACAGG---AAAAGTGTCC-ACGCACAAACTAACTACCTAAATTCTCTGCCGTGCCCAACAGAACAATACCCACAATACCTATCTATGTATTATTGTACATCTACTTATTTACCACTAGCATATGACCAGTAATGTTAACAGTTGATTTGGCCCTAAACAT-GAAAATTATTGAATCCA-CAT-AAATATTTTAATAACATGAATATTAAGCAGAGAATTAAAAGTGAAATGATATAGGACATAAAATTAAACCATTATACTCAACCATGAATATCGTCACAGTAATTGGTTATTTCTTAA-GTAGCTATTCACGAGAAATAAGCAACCCTTGTTAGTAAGATACAACATTACCAGTTTCA…
32	KIOST_22_11_Cm		Juvenile	518	12550	2021	9	Autumn	Jeju Sea	CmP39.1	PP691472	CCCCAAAACCGGAATCCTATAATTAAACTATCCTTTGACACAGGAATAAAAGTGTCC-ACGCACAAACTAACTACCTAAATTCTCTGCCGTGCCCAACAGAACAATACCCACAATACCTATCTATGTATTATTGTACATCTACTTATTTACCACTAGCATATGACCAGTAATGTTAACAGTTGATTTGGCCCTAAACAT-AAAAATTATTAAATTTG-CATAAAATATTTTAATAACATGAATATTAAGCAGAGAGTTAAAAGTGAAATGATATAGGACATAAAATTAAACCATTATACTCAACCATGAATATTGTCACAGTAATTGGTTATTTCTTAA-ATAGCTATTCACGAGAAATAAGCAACCCTTGTTAGTAAGATACAACATTACCAGTTTCA…
33	MR_107_Cm		Juvenile	552	19500	2021	10	Autumn	East Sea	CmP39.1	PP691472	CCCCAAAACCGGAATCCTATAATTAAACTATCCTTTGACACAGGAATAAAAGTGTCC-ACGCACAAACTAACTACCTAAATTCTCTGCCGTGCCCAACAGAACAATACCCACAATACCTATCTATGTATTATTGTACATCTACTTATTTACCACTAGCATATGACCAGTAATGTTAACAGTTGATTTGGCCCTAAACAT-AAAAATTATTAAATTTG-CATAAAATATTTTAATAACATGAATATTAAGCAGAGAGTTAAAAGTGAAATGATATAGGACATAAAATTAAACCATTATACTCAACCATGAATATTGTCACAGTAATTGGTTATTTCTTAA-ATAGCTATTCACGAGAAATAAGCAACCCTTGTTAGTAAGATACAACATTACCAGTTTCA…
34	KIOST_22_12_Cm		Juvenile	506		2021	10	Autumn	Jeju Sea	CmP39.1	PP691472	CCCCAAAACCGGAATCCTATAATTAAACTATCCTTTGACACAGGAATAAAAGTGTCC-ACGCACAAACTAACTACCTAAATTCTCTGCCGTGCCCAACAGAACAATACCCACAATACCTATCTATGTATTATTGTACATCTACTTATTTACCACTAGCATATGACCAGTAATGTTAACAGTTGATTTGGCCCTAAACAT-AAAAATTATTAAATTTG-CATAAAATATTTTAATAACATGAATATTAAGCAGAGAGTTAAAAGTGAAATGATATAGGACATAAAATTAAACCATTATACTCAACCATGAATATTGTCACAGTAATTGGTTATTTCTTAA-ATAGCTATTCACGAGAAATAAGCAACCCTTGTTAGTAAGATACAACATTACCAGTTTCA…
35	MR_109_Cm	Female	Adult	870	66500	2021	11	Autumn	East Sea	CmP49.1	PP691473	CCCCAAAACCGGAATCCTACAATTAAACTATCCTTTGACACAGG---AAAAGTGTCC-ACGCACAAACTAACTACCTAAATTCTCTGCCGTGCCCAACAGAACAATACCCACAATACCTATCTATGTATTATTGTACATCTACTTATTTACCACTAGCATATGACCAGTAATGTTAACAGTTGATTTGGCCCTAAACAT-GAAAATTATTGAATCCA-CAT-AAATATTTTAATAACATGAATATTAAGCAGAGAATTAAAAGTGAAATGATATAGGACATAAAATTAAACCATTATACTCAACCATGAATATCGTCACAGTAATTGGTTATTTCTTAA-GTAGCTATTCACGAGAAATAAGCAACCCTTGTTAGTAAGATACAACATTACCAGTTTCA…
36	KIOST_22_09_Cm		Juvenile	520	12350	2022	5	Spring	Jeju Sea	CmP50.1	PP691474	CCCCAAAACCGGAATCCTACAATTAAACTATCCTTTGACACAGG---AAAAGTGTCC-ACGCACAAACTAACTACCTAAATTCTCTGCCGTGCCCAACAGAACAATACCCACAATACCTATCTATGTATTATTGTACATCTACTTATTTACCACTAGCATATGACCAGTAATGTTAACAGTTGATTTGGCCCTAAACAT-GAAAATTATTGAATCCA-CAT-AAATATTTTAATAACATGAATGTTAAGCAGAGAATTAAAAGTGAAATGATATAGGACATAAAATTAAACCATTATACTCAACCATGAATATCGTCACAGTAATTGGTTATTTCTTAA-GTAGCTATTCACGAGAAATAAGCAACCCTTGTTAGTAAGATACAACATTACCAGTTTCA…
37	MR_115Cc		Juvenile	695	46500	2022	6	Summer	East Sea	CmP49.1	PP691473	CCCCAAAACCGGAATCCTACAATTAAACTATCCTTTGACACAGG---AAAAGTGTCC-ACGCACAAACTAACTACCTAAATTCTCTGCCGTGCCCAACAGAACAATACCCACAATACCTATCTATGTATTATTGTACATCTACTTATTTACCACTAGCATATGACCAGTAATGTTAACAGTTGATTTGGCCCTAAACAT-GAAAATTATTGAATCCA-CAT-AAATATTTTAATAACATGAATATTAAGCAGAGAATTAAAAGTGAAATGATATAGGACATAAAATTAAACCATTATACTCAACCATGAATATCGTCACAGTAATTGGTTATTTCTTAA-GTAGCTATTCACGAGAAATAAGCAACCCTTGTTAGTAAGATACAACATTACCAGTTTCA…
38	KOR0156		Juvenile	410	8460	2022	6	Summer	Jeju Sea	CmP79.1	PP691478	CCCCAAAACCGGAATCCTATAATTAAACTATCCTTTGACACAGGAATAAAAGTGTCC-ACGCACAAACTAACTACCTAAATTCTCTGCCGTGCCCAACAGAACAATACCCACAATACCTATCTATGTATTATTGTACATCTACTTATTTACCACTAGCATATGACCAGTAATGTTAACAGTTGATTTGGCCCTAAACAT-AAAAATTATTAAATTTG-CATAAAATATTTTAATAACATGAATATTAAGCAGAGAGTTAAAAGTGAAATGATATAGGACATAAAATTAAACCATTATACTCAACCATGAATATTGTCACAGTAATTGGTTATTTCTTAA-ATAGCTATTCACGAGAAATAAGCAACCCTTGTTAGTAAGATACAACATTACCAGTTTCA…
39	MR_117_Cm				10000	2022	7	Summer	South Sea	CmP39.1	PP691472	CCCCAAAACCGGAATCCTATAATTAAACTATCCTTTGACACAGGAATAAAAGTGTCC-ACGCACAAACTAACTACCTAAATTCTCTGCCGTGCCCAACAGAACAATACCCACAATACCTATCTATGTATTATTGTACATCTACTTATTTACCACTAGCATATGACCAGTAATGTTAACAGTTGATTTGGCCCTAAACAT-AAAAATTATTAAATTTG-CATAAAATATTTTAATAACATGAATATTAAGCAGAGAGTTAAAAGTGAAATGATATAGGACATAAAATTAAACCATTATACTCAACCATGAATATTGTCACAGTAATTGGTTATTTCTTAA-ATAGCTATTCACGAGAAATAAGCAACCCTTGTTAGTAAGATACAACATTACCAGTTTCA…
40	KIOST_22_06_Cm		Juvenile	486	11100	2022	8	Summer	Jeju Sea	CmP50.1	PP691474	CCCCAAAACCGGAATCCTACAATTAAACTATCCTTTGACACAGG---AAAAGTGTCC-ACGCACAAACTAACTACCTAAATTCTCTGCCGTGCCCAACAGAACAATACCCACAATACCTATCTATGTATTATTGTACATCTACTTATTTACCACTAGCATATGACCAGTAATGTTAACAGTTGATTTGGCCCTAAACAT-GAAAATTATTGAATCCA-CAT-AAATATTTTAATAACATGAATGTTAAGCAGAGAATTAAAAGTGAAATGATATAGGACATAAAATTAAACCATTATACTCAACCATGAATATCGTCACAGTAATTGGTTATTTCTTAA-GTAGCTATTCACGAGAAATAAGCAACCCTTGTTAGTAAGATACAACATTACCAGTTTCA…
