# Supplementary material for: Identifying the source rookery of green turtles (Chelonia mydas) found in feeding grounds around the Korean Peninsula
Source: PeerJ. 2024 Jun 20;12:e17560. doi: 10.7717/peerj.17560 (PMC11193967; doi:10.7717/peerj.17560)
Supplement: Supplemental Information 2 [file peerj-12-17560-s002.xlsx]

## Sheet: Table S2_Hap network
Table S2. Haplotypes of the mitochondrial control region (CR, 754 bp) sequences in the 34 rookery populations of green turtles (Chelonia mydas) worldwide used in the haplotype network analysis. CNMI, Commonwealth of the Northern Mariana Islands
Region	North Western Atlantic			Mediterranean	Eastern Caribbean			South Atlantic			South Western Pacific					Central Western Pacific					Central South Pacific		Central and eastern Pacific					Indo Pacific				Japan			Korea
Population	Florida	Cuba	Atlantic Costa Rica	Cyprus	Saint Croix	Venezuela	Surinam	Central Brazil	Southern Brazil	Guinea Bissau	Northern Great Barrier Reef	Southern Great Barrier Reef	Coral Sea	New Caledonia	Vanuatu	CNMI/ Guam	Micronesia	Palau	Papua New Guinea	Republic of the Marshall Islands	American Samoa	French Polynesia	Hawaii	Revillagigedo Islands	Pacific Mexico	Pacific Costa Rica	Galapagos	Aru	Sarawak	Peninsular Malaysia	Xisha Island	Yaeyama Island	Central Ryuku Island	Ogasawara	Korea
Abbreviation	FL	CU	ACR	CYP	SC	VNZ	SUR	CB	SB	GB	NGRBR	SGBR	CS	NC	VNT	CNMG	MCN	PALAU	PNG	RMI	AS	FP	HAW	RI	PM	PCR	GPG	ARU	SRW	PM	XI	YI	CRI	OGA	KOR	Sequence
Reference	Shamblin et al. 2015a	Barbanti et al. 2019	Shamblin et al. 2012	Barbanti et al. 2019	Shamblin et al. 2012	Shamblin et al. 2012	Shamblin et al. 2012	Shamblin et al. 2015b	Shamblin et al. 2015b	Barbanti et al. 2019	Jensen et al. 2016	Jensen et al. 2016	Read et al. 2015	Dutton et al. 2014a	Read et al. 2015	Dutton et al. 2014a	Dutton et al. 2014a	Dutton et al. 2014a	Read et al. 2015	Read et al. 2015	Read et al. 2015	Dolfo et al. 2023	Dutton et al. 2014b	Dutton et al. 2014b	Dutton et al. 2014b	Dutton et al. 2014b	Dutton et al. 2014b	Read et al. 2015	Joseph et al. 2016a	Joseph et al. 2016a	Li et al. 2023	Hamabata et al. 2014	Hamabata et al. 2014	Hamabata et al. 2020	This study
CM-A1.1	200	1																																		A--GTGTCCAC--ACAAACTAACTACCTAAATTCTCTGCCGTGCCCAACAGAACAATACCCGCAATACCTATCTATGTATTATCGTACATCTACTTATTTACCAATAGCATATGACCAGTAATGTTAACAGTTGATTTGGCCCTAAACATAAAAAATCATTGAATTTACATAAA-TATTTTAACAACATGAATATTAAGCAGAGGATTAAAAGTGAAATGACATAGGACATAAAATTAAACTATTATACTCAACCATGAATATCGTCACAGTAATTGGTTATTTCCTAAATAGCTATTCACGAGAAATAAGCAACCCTTGTTAGTAAGATACAACATTACCAGTTTCAAGCCCATTCAGTCTGTGGCGTACATAATTTGATCTATTCTGGCCTCTGGTT…
CM-A1.2	24	2																																		A--GTGTCCAC--ACAAACTAACTACCTAAATTCTCTGCCGTGCCCAACAGAACAATACCCGCAATACCTATCTATGTATTATCGTACATCTACTTATTTACCAATAGCATATGACCAGTAATGTTAACAGTTGATTTGGCCCTAAACATAAAAAATCATTGAATTTACATAAA-TATTTTAACAACATGAATATTAAGCAGAGGATTAAAAGTGAAATGACATAGGACATAAAATTAAACTATTATACTCAACCATGAATATCGTCACAGTAATTGGTTATTTCCTAAATAGCTATTCACGAGAAATAAGCAACCCTTGTTAGTAAGATACAACATTACCAGTTTCAAGCCCATTCAGTCTGTGGCGTACATAATTTGATCTATTCTGGCCTCTGGTT…
CM-A2.1	11																																			A--GTGTCCAC--ACAAACTAACTACCTAAATTCTCTGCCGTGCCCAACAGAACAATACCCGCAATACCTATCTATGTATTATCGTACATCTACTTATTTACCAATAGCATATGACCAGTAATGTTAACAGTTGATTTGGCCCTAAACATAAAAAATCATTGGATTTACATAAA-TATTTTAACAACATGAATATTAAGCAGAGGATTAAAAGTGAAATGACATAGGACATAAAATTAAACTATTATACTCAACCATGAATATCGTCACAGTAATTGGTTATTTCCTAAATAGCTATTCACGAGAAATAAGCAACCCTTGTTAGTAAGATACAACATTACCAGTTTCAAGCCCATTCAGTCTGTGGCGTACATAATTTGATCTATTCTGGCCTCTGGTT…
CM-A3.1	219	37	2			5	1																													A--GTGTCCAC--ACAAACTAACTACCTAAATTCTCTGCCGTGCCCAACAGAACAATACCCGCAATACCTATCTATGTATTATTGTACATCTACTTATTTACCAATAGCATATGACCAGTAATGTTAACAGTTGATTTGGCCCTAAACATAAAAAATCATTGAATTTACATAAA-TATTTTAACAACATGAATATTAAGCAGAGGATTAAAAGTGAAATGACATAGGACATAAAATTAAACTATTATACTCAACCATGAATATCGTCACAGTAATTGGTTATTTCCTAAATAGCTATTCACGAGAAATAAGCAACCCTTGTTAGTAAGATACAACATTACCAGTTTCAAGCCCATTCAGTCTGTGGCGTACATAATTTGATCTATTCTGGCCTCTGGTT…
CM-A5.1	6	4	32		44	48	55																													A--GTGTCCAC--ACAAACTAACTACCTAAATTCTCTGCCGTGCCCAACAGAACAATACCCGCAATACCTATCTATGTATTATCGTGCATCTACTTATTTACCAATAGCATATGACCAGTAATATTAACAGTTGATTTGGCCCTAAACATAAAAAATCATTGAATTTACATAAA-TATTTTAACAACATGAATATTAAGCAGAGGATTAAAAGTGAAATGACATAGGACATAAAATTAAACCATTATACTCAACCATGAATATCGTCACAGTAATGGGTTATTTCCTAAATAGCTATTCACGAGAAATAAGCAACCCTTGTTAGTAAGATACAACATTACCAGTTTCAAGCCCATTCAATCTGTGGCGTACATAATTTGATCTATTCTGGCCTCTGGTT…
CM-A5.2					1	14																														A--GTGTCCAC--ACAAACTAACTACCTAAATTCTCTGCCGTGCCCAACAGAACAATACCCGCAATACCTATCTATGTATTATCGTGCATCTACTTATTTACCAATAGCATATGACCAGTAATATTAACAGTTGATTTGGCCCTAAACATAAAAAATCATTGAATTTACATAAA-TATTTTAACAACATGAATATTAAGCAGAGGATTAAAAGTGAAATGACATAGGACATAAAATTAAACCATTATACTCAACCATGAATATCGTCACAGTAATGGGTTATTTCCTAAATAGCTATTCACGAGAAATAAGCAACCCTTGTTAGTAAGATACAACATTACCAGTTTCAAGCCCATTCAATCTGTGGCGTACATAATTTGATCTATTCTGGCCTCTGGTT…
CM-A6.1							2																													A--GTGTCCAC--ACAAACTAACTACCTAAATTCTCTGCCGTGCCCAACAGAACAATACCCGCAATACCTATCTATGTATTATCGTGCATCTACTTATTTACCAATAGCATATGACCAGTAATATTAACAGTTGATTTGGCCCTAAACATAAAAAATCATTGAATTTACATAAA-TATTTTAACAACATGAATATTAAGCAGAGGATTAAAAGTGAAATGACATAGGACATAAAATTAAACCATTATACTCAACCATGAATATCGTCACAGTAATGGGTTATTTCCTAAATAGCTATTCACGAGAAATAAGCAACCCTTGTTAGTAAGATACAACATTACCAGTTTCAAGCCCATTCAATCTGTGGCGTACATAATTTGATCTATTCTGGCCTCTGGTT…
CM-A8.1	1							41	55	169																										A--GTGTCCAC--ACAAACTAACTACCTAAATTCTCTGCCGTGCCCAACAGAACAATACCCGCAATACCTATCTATGTATTATCGTGCATCTACTTATTTACCAATAGCATATGACCAGTAATGTTAACAGTTGATTTGGCCCTAAACATAAAAAATCATTGAATTTACATAAA-TATTTTAACAACATGAATATTAAGCAGAGGATTAAAAGTGAAATGACATAGGACATAAAATTAAACCATTATACTCAACCATGAATATCGTCACAGTAATGGGTTATTTCCTAAATAGCTATTCACGAGAAATAAGCAACCCTTGTTAGTAAGATACAACATTACCAGTTTCAAGCCCATTCAATCTGTGGCGTACATAATTTGATCTATTCTGGCCTCTGGTT…
CM-A8.3								1	12	1																										A--GTGTCCAC--ACAAACTAACTACCTAAATTCTCTGCCGTGCCCAACAGAACAATACCCGCAATACCTATCTATGTATTATCGTGCATCTACTTATTTACCAATAGCATATGACCAGTAATGTTAACAGTTGATTTGGCCCTAAACATAAAAAATCATTGAATTTACATAAA-TATTTTAACAACATGAATATTAAGCAGAGGATTAAAAGTGAAATGACATAGGACATAAAATTAAACCATTATACTCAACCATGAATATCGTCACAGTAATGGGTTATTTCCTAAATAGCTATTCACGAGAAATAAGCAACCCTTGTTAGTAAGATACAACATTACCAGTTTCAAGCCCATTCAATCTGTGGCGTACATAATTTGATCTATTCTGGCCTCTGGTT…
CM-A9.1								2	19																											A--GTGTCCAC--ACAAACTAACTACCTAAATTCTCTGCCGTGCCCAACAGAACAATACCCGCAATACCTATCTATGTATTATCGTGCATCTACTTATTTACCAATAGCATATGACCAGTAATGTTAACAGTTGATTTGGCCCTAAACATAAAAAATCATTGAATTTACATAAA-TATTTTAACAACATGAATATTAAGCAGAGGATTAAAAGTGAAATGACATAGGACATAAAATTAAACCATTATACTCAACCATGAATATCGTCACAGTAATGGGTTATTTCCTAAATAGCTATTCACGAGAAATAAGCAACCCTTGTTAGTAAGATACAACATTACCAGTTTCAAGCCCATTCAATCTGTGGCGTACATAATTTGATCTATTCTGGCCTCTGGTT…
CM-A10.1								2																												A--GTGTCCAC--ACAAACTAACTACCTAAATTCTCTGCCGTGCCCAACAGAACAATACCCGCAATACCTATCTATGTATTATCGTGCATCTACTTATTTACCAATAGCATATGACCAGTAATGTTAACAGTTGATTTGGCCCTAAACATAAAAAATCATTGAATTTACATAAA-TATTTTAACAACATGAATATTAAGCAGAGGATTAAAAGTGAAATGACATAGGACATAAAATTAAACCATTATACTCAACCATGAATATCGTCACAGTAATGGGTTATTTCTTAAATAGCTATTCACGAGAAATAAGCAACCCTTGTTAGTAAGATACAACATTACCAGTTTCAAGCCCATTCAATCTGTGGCGTACATAATTTGATCTATTCTGGCCTCTGGTT…
CM-A11.1									1																											A--GTGTCCAC--ACAAACTAACTACCTAAATTCTCTGCCGTGCCCAACAGAACAATACCCGCAATACCTATCTATGTATTATCGTGCATCTACTTATTTACCAATAGCATATGACCAGTAATGTTAACAGTTGATTTGGCCCTAAACATAAAAAATCATTAAATTTACATAAA-TATTTTAACAACATGAATATTAAGCAGAGGATTAAAAGTGAAATGACATAGGACATAAAATTAAACCATTATACTCAACCATGAATATCGTCACAGTAATGGGTTATTTCCTAAATAGCTATTCACGAGAAATAAGCAACCCTTGTTAGTAAGATACAACATTACCAGTTTCAAGCCCATTCAATCTGTGGCGTACATAATTTGATCTATTCTGGCCTCTGGTT…
CM-A12.1								3																												A--GTGTCCAC--ACAAACTAACTACCTAAATTCTCTGCCGTGCCCAACAGAACAATACCCGCAATACCTATCTATGTATTATCGTGCATCTACTTATTTACCAATAGCATATGACCAGTAATGTTAACAGTTGATTTGGCCCTAAACATAAAAAATCATTGAATTTACATAAA-TATTTTAACAACATGAATATTAAGCAGAGGATTAAAAGTGAAATGACATAGGACATAAAATTAAACCATTATACTCAACCATGAATATTGTCACAGTAATGGGTTATTTCCTAAATAGCTATTCACGAGAAATAAGCAACCCTTGTTAGTAAGATACAACATTACCAGTTTCAAGCCCATTCAATCTGTGGCGTACATAATTTGATCTATTCTGGCCTCTGGTT…
CM-A13.1	9	2		394																																A--GTGTCCAC--ACAAACTAACTACCTAAATTCTCTGCCGTGCCCAACAGAACAATACCCGCAATACCTATCTATGTATTATCGTACATCTACTTATTTACCAATAGCATATGACCAGTAATGTTAACAGTTGATTTGACCCTAAACATAAAAAATCATTGAATTTACATAAA-TATTTTAACAACATGAATATTAAGCAGAGGATTAAAAGTGAAATGACATAGGACATAAAATTAAACCATTATACTCAACCATGAATATCGTCACAGTAATTGGTTATTTCCTAAATAGCTATTCACGAGAAATAAGCAACCCTTGTTAGTAAGATACAACATTACCAGTTTCAAGCCCATTCAGTCTGTGGCGTACATAATTTGATCTATTCTGGCCTCTGGTT…
CM-A14.1				22																																A--GTGTCCAC--ACAAACTAACTACCTAAATTCTCTGCCGTGCCCAACAGAACAATACCCGCAATACCTATCTATGTATTATCGTACATCTACTTATTTACCAATAGCATATGACCAGTAATGTTAACAGTTGATTTGACCCTAAACATAAAAAATCATTGAATTTACATAAA-TATTTTAACAACATGAATATTAAGCAGAGGATTAAAAGTGAAATGACATAGGACATAAAATTAAACCATTATACTCAACCATGAATATCGTCACAGTAATTGGTTATTTCCTAAATAGCTATTCACGAGAAATAAGCAACCCTTGTTAGTAAGATACAACATTACCAGTTTCAAGCCCATTAAGTCTGTGGCGTACATAATTTGATCTATTCTGGCCTCTGGTT…
CM-A16.1	3	1			4																															A--GTGTCCAC--ACAAACTAACTACCTAAATTCTCTGCCGTGCCCAACAGAACAATACCCGCAATACCTATCTATGTATTATCGTACATCTACTTATTTACCAATAGCATATGACCAGTAATGTTAACAGTTGATTTGACCCTAAACATAAAAAATCATTGAATTTACATAAA-TATTTTAACAACATGAATATTAAGCAGAGGATTAAAAGTGAAATGACATAGGACATAAAATTAAACCATTATACTCAACCATGAATATTGTCACAGTAATTGGTTATTTCCTAAATAGCTATTCACGAGAAATAAGCAACCCTTGTTAGTAAGATACAACATTACCAGTTTCAAGCCCATTCAGTCTGTGGCGTACATAATTTGATCTATTCTGGCCTCTGGTT…
CM-A17.1	2	2																																		A--GTGTCCAC--ACAAACTAACTACCTAAATTCTCTGCCGTGCCCAACAGAACAATACCCGCAATACCTATCTATGTATTATCGTACATCTACTTATTTACCAATAGCATATGACCAGTAATGTTAACAGTTGATTTGACCCTAAACATAAAAAATCATTGAATTTACATAAA-TATTTTAACAACATGAATATTAAGCAGAGGATTAAAAGTGAAATGACATAGGACATAAAATTAAACCATTATACTCAACCATGAATATCGTCACAGTAATTGGTTATTTCCTAAATAGCTATTCACGAGAAATAAGCAACCCTTGTTAGTAAGATACAACATTACCAGTTTCAAGCCCATTCAGTCTATGGCGTACATAATTTGATCTATTCTGGCCTCTGGTT…
CM-A18.2	2	1																																		A--GTGTCCAC--ACAAACTAACTACCTAAATTCTCTGCCGTGCCCAACAGAACAATACCCGCAATACCTATCTATGTATTATCGTGCATCTACTTATTTACCAATAGCATATGACCAGTAATGTTAACAGTTGATTTGGCCCTAAACATAAAAAATCATTGAATTTACATAAA-TATTTTAACAACATGAATATTAAGCAGAGGATTAAAAGTGAAATGACATAGGACATAAAATTAAACTATTATACTCAACCATGAATATCGTCACAGTAATTGGTTATTTCCTAAATAGCTATTCACGAGAAATAAGCAACCCTTGTTAGTAAGATACAACATTACCAGTTTCAAGCCCATTCAGTCTGTGGCGTACATAATTTGATCTATTCTGGCCTCTGGTT…
CM-A20.1			2																																	A--GTGTCCAC--ACAAACTAACTACCTAAATTCTCTGCCGTGCCCAACAGAACAATACCCGCAATACCTATCTATGTATTATCGTGCATCTACTTATTTACCAATAGCATATGACCAGTAATATTAACAGTTGATTTGGCCCTAAACATAAAAAATCATTGAGTTTACATAAA-TATTTTAACAACATGAATATTAAGCAGAGGATTAAAAGTGAAATGACATAGGACATAAAATTAAACCATTATACTCAACCATGAATATCGTCACAGTAATGGGTTATTTCCTAAATAGCTATTCACGAGAAATAAGCAACCCTTGTTAGTAAGATACAACATTACCAGTTTCAAGCCCATTCAATCTGTGGCGTACATAATTTGATCTATTCTGGCCTCTGGTT…
CM-A21.1			3																																	A--GTGTCCAC--ACAAACTAACTACCTAAATTCTCTGCCGTGCCCAACAGAACAATACCCGCAATACCTATCTATGTATTATCGTGCATCTACTTATTTACCAATAGCATATGACCAGTAATATTAACAGTTGATTTGGCCCTAAACATAAAAAATCATTGAATTTACATAAA-TATTTTAACAACATGAATATTAAGCAGAGGATTAAAAGTGAAATGACATAGGACATAAAATTAAACCATTATACTCAACCATGAATATCGTCACAGTAATGGGTTATTTCCTAAATAGCTATTCACGAGAAATAAGCAACCCTTGTTAGTAAGATACAACATTACCAGTTTCAAGCCCATTCAATCTGTGGCGTACATAATTTGATCTATTCTGGCCTCTGGTT…
CM-A22.1		2																																		A--GTGTCCAC--ACAAACTAACTACCTAAATTCTCTGCCGTGCCCAACAGAACAATACCCGCAATACCTATCTATGTATTATCGTACATCTACTTATTTACCGATAGCATATGACCAGTAATGTTAACAGTTGATTTGGCCCTAAACATAAAAAATCATTGAATTTACATAAA-TATTTTAACAACATGAATATTAAGCAGAGGATTAAAAGTGAAATGACATAGGACATAAAATTAAACCATTATACTCAACCATGAATATCGTCACAGTAATTGGTTATTTCCTAAATAGCTATTCACGAGAAATAAGCAACCCTTGTTAGTAAGATACAACATTACCAGTTTCAAGCCCATTCAGTCTGTAACGTACATAATTTGATCTATTCTGGCCTCTGGTT…
CM-A23.1									6																											A--GTGTCCAC--ACAAACTAACTACCTAAATTCTCTGCCGTGCCCAACAGAACAATACCCGCAATACCTATCTATGTATTATCGTGCATCTACTTATTTACCGATAGCATATGACCAGTAATGTTAACAGTTGATTTGGCCCTAAACATAAAAAATCATTGAATTTACATAAA-TATTTTAACAACATGAATATTAAGCAGAGGATTAAAAGTGAAATGACATAGGACATAAAATTAAACCATTATACTCAACCATGAATATCGTCACAGTAATGGGTTATTTCCTAAATAGCTATTCACGAGAAATAAGCAACCCTTGTTAGTAAGATACAACATTACCAGTTTCAAGCCCATTCAATCTGTGGCGTACATAATTTGATCTATTCTGGCCTCTGGTT…
CM-A24.1									1																											A--GTGTCCAC--ACAAACTAACTACCTAAATTCTCTGCCGTGCCCAACAGAACAATACCCGCAATACCTATCTATGTATTATCGTGCATCTACTTATTTACCAATAGCATATGACCAGTAATGTTAACAGTTGATTTGGCCCTAAACATAAAAAATCATTGAATTTACATAAA-TATTTTAACAACATGAATATTAAGCAGAGGATTAAAAGTGAAATGACATAGGACATAAAATTAAACCATTATACTCAACCATGAATATCGTCACAGTAATGGGTTATTTCCTAAATAGCTATTCACGAGAAATAAGCAACCCTTGTTAGTAAGATACAACATTACCAGTTTCAAGCCCATTCAATCTGTGGCGTACATAATTTGATCTATTCTGGCCTCTGGTT…
CM-A25.1								3																												A--GTGTCCAC--ACAAACTAACTACCTAAATTCTCTGCCGTGCCCAACAGAACAATACCCGCAATACCTATCTATGTATTATCGTGCATCTACTTATTTACCAATAGCATATGACCAGTAATGTTAACAGTTGATTTGGCCCTAAACATAAAAAATCATTGAATTTACATAAA-TATTTTAACAACATGAATATTAAGCAGAGGATTAAAAGTGAAATGACATAGGACATAAAATTAAACCATTATACTCAACCATGAATATCGTCACAGTAATGGGTTATTTCCTAAATAGCTATTCACGAGAAATAAGCAACCCTTGTTAGTAAGATACAACATTACCAGTTTCAAGCCCATTCAATCTGTGGCGTACATAATTTGATCTATTCTGGCCTCTGGTT…
CM-A27.1		3																																		A--GTGTCCAC--ACAAACTAACTACCTAAATTCTCTGCCGTGCCCAACAGAACAATACCCGCAATACCTATCTATGTATTATCGTACATCTACTTATTTACCAATAGCATATGACCAGTAATGTTAACAGTTGATTTGGCCCTAAACATAAAAAATCATTGAATTTACATAAA-TATTTTAACAACATGAATATTAAGCAGAGGATTAAAAGTGAAATGACATAGGACATAAAATTAAACCATTATACTCAACCATGAATATCGTCACAGTAATTGGTTATTTCCTAAATAGCTATTCACGAGAAATAAGCAACCCTTGTTAGTAAGATACAACATTACCAGTTTCAAGCCCATTCAGTCTGTGGCGTACATAATTTGATCTATTCTGGCCTCTGGTT…
CM-A28.1	5																																			A--GTGTCCAC--ACAAACTAACTACCTAAATTCTCTGCCGTGCCCAACAGAACAATACCCGCAATACCTATCTATGTATTATTGTACATCTACTTATTTACCAATAGCATATGACCAGTAATGTTAACAGTTGATTTGGCCCTAAACATAAAAAATCATTGAATTTACATAAA-TATTTTAACAACATGAATATTAAGCAGAGGATTAAAAGTGAAATGACATAGGACATAAAATTAAACCATTATACTCAACCATGAATATCGTCACAGTAATTGGTTATTTCCTAAATAGCTATTCACGAGAAATAAGCAACCCTTGTTAGTAAGATACAACATTACCAGTTTCAAGCCCATTCAGTCTGTGGCGTACATAATTTGATCTATTCTGGCCTCTGGTT…
CM-A32.1								1	5																											A--GTGTCCAC--ACAAACTAACTACCTAAATTCTCTGCCGTGCCCAACAGAACAATACCCGCAATACCTATCTATGTATTATCGTGCATCTACTTATTTACCAATAGCATATGACCAGTAATGTTAACAGTTGATTTGGCCCTAAACATAAAAAATCATTGAATTTACATAAA-TATTTTAACAACATGAATATTAAGCAGAGGATTAAAAGTGAAATGACATAGGACATAAAATTAAACCATTATACTCAACCATGAATATCGTCACAGTAATGGGTTATTTCCTAAATAGCTATTCACGAGAAATAAGCAACCCTTGTTAGTAAGATACAACATTACCAGTTTCAAGCCCATTCAGTCTGTGGCGTACATAATTTGATCTATTCTGGCCTCTGGTT…
CM-A34.1		1																																		A--GTGTCCAC--ACAAACTAACTACCTAAATTCTCTGCCGTGCCCAACAGAACAATACCCGCAATACCTATCTATGTATTATCGTACATCTACTTATTTACCAATAGCATATGACCAGTAATGTTAACAGTTGATTTGACCCTAAACATAAAAAACCATTGAATTTACATAAA-TATTTTAACAACATGAATATTAAGCAGAGGATTAAAAGTGAAATGACATAGGACATAAAATTAAACCATTATACTCAACCATGAATATCGTCACAGTAATTGGTTATTTCCTAAATAGCTATTCACGAGAAATAAGCAACCCTTGTTAGTAAGATACAACATTACCAGTTTCAAGCCCATTCAGTCTATGGCGTACATAATTTGATCTATTCTGGCCTCTGGTT…
CM-A42.1										1																										A--GTGTCCAC--ACAAACTAACTACCTAAATTCTCTGCCGTGCCCAACAGAACAATACCCGCAATACCTATCTATGTATTATCGTGCATCTACTTATTTACCAATAGCATATGACCAGTAATGTTAACAGTTGATTTGGCCCTAAACATAAAAAATCATTGAATTTACATAAA-TATTTTAACAACATGAATATTAAGCAGAGGATTAAAAGTGAAATGACATAGGACATAAAATTAAACCATTATACTCAACCATGAATATCGTCACAGTAATGGGTTATTTCCTAAATAGCTATTCACGAGAAATAAGCAACCCTTGTTAGTAAGATACAACATTACCAGTTTCAAGCCCATTCAATCTGTGGCGTACATAATTTGATCTATTCTGGCCTCTGGTT…
CM-A53.1	3																																			A--GTGTCCAC--ACAAACTAACTACCTAAATTCTCTGCCGTGCCCAACAGAACAATACCCGCAATACCTATCTATGTATTATTGTACATCTACTTATTTACCAATAGCATATGACCAGTAATGTTAACAGTTGATTTGGCCCTAAACATAAAAAATCATTGAATTTACATAAA-TATTTTAACAACATGAATATTAAGCAGAGGATTAAAAGTGAAATGACATGGGACATAAAATTAAACTATTATACTCAACCATGAATATCGTCACAGTAATTGGTTATTTCCTAAATAGCTATTCACGAGAAATAAGCAACCCTTGTTAGTAAGATACAACATTACCAGTTTCAAGCCCATTCAGTCTGTGGCGTACATAATTTGATCTATTCTGGCCTCTGGTT…
CM-A60.1				1																																A--GTGTCCAC--ACAAACTAACTACCTAAATTCTCTGCCGTGCCCAACAGAACAATACCCGCAATACCTATCTATGTATTATCGTGCATCTACTTATTTACCAATAGCATATGACCAGTAATGTTAACAGTTGATTTGACCCTAAACATAAAAAATCATTGAATTTACATAAA-TATTTTAACAACATGAATATTAAGCAGAGGATTAAAAGTGAAATGACATAGGACATAAAATTAAACCATTATACTCAACCATGAATATCGTCACAGTAATTGGTTATTTCCTAAATAGCTATTCACGAGAAATAAGCAACCCTTGTTAGTAAGATACAACATTACCAGTTTCAAGCCCATTCAGTCTGTGGCGTACATAATTTGATCTATTCTGGCCTCTGGTT…
CM-A62.1				1																																A--GTGTCCAC--ACAAACTAACTACCTAAATTCTCTGCCGTGCCCAACAGAACAATACCCGCAATACCTATCTATGTATTATCGTACATCTACTTATTTACCAATAGCATATGACCAGTAATGTTAACAGTTGATTTGACCCTAAACATAAAAAATCATTGAATTTACATAAA-TATTTTAACAACATGAATATTAAGCAGAGGATTAAAAGTGAAATGACATAGGACATAAAATTAAACCATTATACTCAACCATGAATATCGTCACAGTAATTGGTTATTTCCTAAATAGCTATTCACGAGAAATAAGCAACCCTTGTTAGTAAGATACAACATTACCAGTTTCAAGCCCATTCAGTCTGTGGCGTGCATAATTTGATCTATTCTGGCCTCTGGTT…
CM-A78.1		1																																		A--GTGTCCAC--ACAAACTAACTACCTAAATTCTCTGCCGTGCCCAACAGAACAATACCCGCAATACCTATCTATGTATTATCGTGCATCTACTTATTTACCAATAGCATATGACCAGTAATGTTAACAGTTGATTTGGCCCTAAACATAAAAAATCATTGAATTTACATAAA-TATTTTAACAACATGAATATTAAGCAGAGGATTAAAAGTGAAATGACATAGGACATAAAATTAAACTATTATACTCAACCATGAATATCGTCACGGTAATTGGTTATTTCCTAAATAGCTATTCACGAGAAATAAGCAACCCTTGTTAGTAAGATACAACATTACCAGTTTCAAGCCCATTCAGTCTGTGGCGTACATAATTTGATCTATTCTGGCCTCTGGTT…
CM-P1.1																							145	1												A--GTGTCCACGCACAAACTAACTACCTAAATTCTCTGCCGTGCCCAACAGAACAATACCCACAATACCTATCTATGTATTATTGTACATCTACTTATTTACCACTAGCATATGACCAGTAATGTTAACAGTTGATTTGGCCCTAAACATGAAAATT-ATTGAATTCACATAAA-TATTTTGATAACATGAATATTAAGCAGAGAATTAAAAGTGAAATGATATAGGACATAAAATTAAACCATTATACTCAACCATGAATATCGTCACAGTAATTGGTTATTTCTTAAGTAGCTATTCACGAGAAATAAGCAACCCTTGTTAGTAAGATACAACATTACCAGTTTCAGGCCCATTTAGTTTATAGCGTACATAACCTGATCTATTCTGGCCTCTGGTT…
CM-P2.1																							29													A--GTGTCCACGCACAAACTAACTACCTAAATTCTCTGCCGTGCCCAACAGAACAATACCCACAATACCTATCTATGTATTATTGTACATCTACTTATTTACCACTAGCATATGACCAGTAATGTTAACAGTTGATTTGGCCCTAAACATGAAAATT-ATTAAATCCACATAAA-TATTTTGATAACATGAATATTAAGCAGAGGATTAAAAGTGAAATGATATAGGACATAAAATTAAACCATTATACTCAACCATGAATATCGTCACAGTAATTGGTTATTTCTTAAGTAGCTATTCACGAGAAATAAGCAACCCTTGTTAGTAAGATACAACATTACCAGTTTCAGGCCCATTTAGTTTATAGCGTACATA-CCTGATCTATTCTGGCCTCTGGTT…
CM-P3.1																							13	8												A--GTGTCCACGCACAAACTAACTACCTAAATTCTCTGCCGTGCCCAACAGAACAATACCCACAATACCTATCTATGTATTATTGTACATCTACTTATTTACCACTAGCATATGACCAGTAATGTTAACAGTTGATTTGGCCCTAAACATGAAAATT-ATTGAATCCACATAAA-TATTTTGATAACATGAATATTAAGCAGAGAATTAAAAGTGAAATGATATAGGACATAAAATTAAACCATTATACTCAACCATGAATATCGTCACAGTAATTGGTTATTTCTTAAGTAGCTATTCACGAGAAATAAGCAACCCTTGTTAGTAAGATACAACATTACCAGTTTCAGGCCCATTTAGTTTATAGCGTACATAACCTGATCTATTCTGGCCTCTGGTT…
CM-P3.2																							15													A--GTGTCCACGCACAAACTAACTACCTAAATTCTCTGCCGTGCCCAACAGAACAATACCCACAATACCTATCTATGTATTATTGTACATCTACTTATTTACCACTAGCATATGACCAGTAATGTTAACAGTTGATTTGGCCCTAAACATGAAAATT-ATTGAATCCACATAAA-TATTTTGATAACATGAATATTAAGCAGAGAATTAAAAGTGAAATGATATAGGACATAAAATTAAACCATTATACTCAACCATGAATATCGTCACAGTAATTGGTTATTTCTTAAGTAGCTATTCACGAGAAATAAGCAACCCTTGTTAGTAAGATACAACATTACCAGTTTCAGGCCCATTTAGTTTATAGCGTACATAACCTGATCTATTCTGGCCTCTGGTT…
CM-P4.1																								13	58	2	26									A--GTGTCCACGCACAAACTAACTACCTAAATTCTCTGCCGTGCCCAACAGAACAATACCCACAATACCTATCTATGTATTATTGTACATCTACTTATTTACCACTAGCATATGACCAGTAATGTTAACAGTTGATTTGGCCCTAAACATGAAAATT-ATTGAATCCACATAAA-TATTTTGATAACATGAATATTAAGCAGAGAATTAAAAGTGAAATGATATAGGACATAAAATTAAACCATTATACTCAACCATGAATATCGTCACAGTAATTGGTTATTTCTTAAGTAGCTATTCACGAGAAATAAGCAACCCTTGTTAGTAAGATACAACATTACCAGTTTCAGGCCCATTTAGTTTATAGCGTACATAACCTGATCTATTCTGGCCTCTGGTT…
CM-P4.2																								2												A--GTGTCCACGCACAAACTAACTACCTAAATTCTCTGCCGTGCCCAACAGAACAATACCCACAATAACTATCTATGTATTATTGTACATCTACTTATTTACCACTAGCATATGACCAGTAATGTTAACAGTTGATTTGGCCCTAAACATGAAAATT-ATTGAATCCACATAAA-TATTTTGATAACATGAATATTAAGCAGAGAATTAAAAGTGAAATGATATAGGACATAAAATTAAACCATTATACTCAACCATGAATATCGTCACAGTAATTGGTTATTTCTTAAGTAGCTATTCACGAGAAATAAGCAACCCTTGTTAGTAAGATACAACATTACCAGTTTCAGGCCCATTTAGTTTATAGCGTACATAACCTGATCTATTCTGGCCTCTGGTT…
CM-P4.3																									2											A--GTGTCCACGCACAAACTAACTACCTAAATTCTCTGCCGTGCCCAACAGAACAATACCCACAATACCTATCTATGTATTATTGTGCATCTACTTATTTACCACTAGCATATGACCAGTAATGTTAACAGTTGATTTGGCCCTAAACATGAAAATT-ATTGAATCCACATAAA-TATTTTGATAACATGAATATTAAGCAGAGAATTAAAAGTGAAATGATATAGGACATAAAATTAAACCATTATACTCAACCATGAATATCGTCACAGTAATTGGTTATTTCTTAAGTAGCTATTCACGAGAAATAAGCAACCCTTGTTAGTAAGATACAACATTACCAGTTTCAGGCCCATTTAGTTTATAGCGTACATAACCTGATCTATTCTGGCCTCTGGTT…
CM-P4.4																											6									A--GTGTCCACGCACAAACTAACTACCTAAATTCTCTGCCGTGCCCAACAGAACAATACCCACAATACCTATCTATGTATTATTGTACATCTACTTATTTACCACTAGCATATGACCAGTAATGTTAACAGTTGATTTGGCCCTAAACATGAAAATT-ATTGAATCCACATAAA-TATTTTGATAACATGAATATTAAGCAGAGAATTAAAAGTGAAATGATATAGGACATAAAATTAAACCATTATACTCAACCATGAATATCGTCACAGTAATTGGTTATTTCTTAAGTAGCTATTCACGAGAAATAAGCAACCCTTGTTAGTAAGATACAACATTACCAGTTTCAGGCCCATTTAGTTTATAGCGTACATAACCTGATCTATTCTGGCCTCTGGTT…
CM-P4.5																								3												A--GTGTCCACGCACAAACTAACTACCTAAATTCTCTGCCGTGCCCAACAGAACAATACCCACAATACCTATCTATGTATTATTGTACATCTACTTATTTACCACTAGCATATGACCAGTAATGTTAACAGTTGATTTGGCCCTAAACATGAAAATT-ATTGAATCCACATAAA-TATTTTGATAACATGAATATTAAGCAGAGAATTAAAAGTGAAATGATATAGGACATAAAATTAAACCATTATACTCAACCATGAATATCGTCACAGTAATTGGTTATTTCTTAAGTAGCTATTCACGAGAAATAAGCAACCCTTGTTAGTAAGATACAACATTACCAGTTTCAGGCCCATTTAGTTTATAGCGTACATAACCTGATCTATTCTGGCCTCTGGTT…
CM-P4.6																									7	7	51									A--GTGTCCACGCACAAACTAACTACCTAAATTCTCTGCCGTGCCCAACAGAACAATACCCACAATACCTATCTATGTATTATTGTACATCTACTTATTTACCACTAGCATATGACCAGTAATGTTAACAGTTGATTTGGCCCTAAACATGAAAATT-ATTGAATCCACATAAA-TATTTTGATAACATGAATATTAAGCAGAGAATTAAAAGTGAAATGATATAGGACATAAAATTAAACCATTATACTCAACCATGAATATCGTCACAGTAATTGGTTATTTCTTAAGTAGCTATTCACGAGAAATAAGCAACCCTTGTTAGTAAGATACAACATTACCAGTTTCAGGCCCATTTAGTTTATAGCGTACATAACCTGATCTATTCTGGCCTCTGGTT…
CM-P4.7																											31									A--GTGTCCACGCACAAACTAACTACCTAAATTCTCTGCCGTGCCCAACAGAACAATACCCACAATACCTATCTATGTATTATTGTACATCTACTTATTTACCACTAGCATATGACCAGTAATGTTAACAGTTGATTTGGCCCTAAACATGAAAATT-ATTGAATCCACATAAA-TATTTTGATAACATGAATATTAAGCAGAGAATTAAAAGTGAAATGATATAGGACATAAAATTAAACCATTATACTCAACCATGAATATCGTCACAGTAATTGGTTATTTCTTAAGTAGCTATTCACGAGAAATAAGCAACCCTTGTTAGTAAGATACAACATTACCAGTTTCAGGCCCATTTAGTTTATAGCGTACATAACCTGATCTATTCTGGCCTCTGGTT…
CM-P4.8																									5											A--GTGTCCACGCACAAACTAACTACCTAAATTCTCTGCCGTGCCCAACAGAACAATACCCACAATACCTATCTATGTATTATTGTACATCTACTTATTTACCACTAGCATATGACCAGTAATGTTAACAGTTGATTTGGCCCTAAACATGAAAATT-ATTGAATCCACATAAA-TATTTTGATAACATGAATATTAAGCAGAGAATTAAAAGTGAAATGATATAGGACATAAAATTAAACCATTATACTCAACCATGAATATCGTCACAGTAATTGGTTATTTCTTAAGTAGCTATTCACGAGAAATAAGCAACCCTTGTTAGTAAGATACAACATTACCAGTTTCAGGCCCATTTAGTTTATAGCGTACATAACCTGATCTATTCTGGCCTCTGGTT…
CM-P4.9																											1									A--GTGTCCACGCACAAACTAACTACCTAAATTCTCTGCCGTGCCCAACAGAACAATACCCACAATACCTATCTATGTATTATTGTACATCTACTTATTTACCACTAGCATATGACCAGTAATGTTAACAGTTGATTTGGCCCTAAACATGAAAATT-ATTGAATCCACATAAA-TATTTTGATAACATGAATATTAAGCAGAGAATTAAAAGTGAAATGATATAGGACATAAAATTAAACCATTATACTCAACCATGAATATCGTCACAGTAATTGGTTATTTCTTAAGTAGCTATTCACGAGAAATAAGCAACCCTTGTTAGTAAGATACAACATTACCAGTTTCAGGCCCATTTAGTTTATAGCGTACATAACCTGATCTATTCTGGCCTCTGGTT…
CM-P4.10																																				A--GTGTCCACGCACAAACTAACTACCTAAATTCTCTGCCGTGCCCAACAGAACAATACCCACAATACCTATCTATGTATTATTGTACATCTACTTATTTACCACTAGCATATGACCAGTAATGTTAACAGTTGATTTGGCCCTAAACATGAAAATT-ATTGAATCCACATAAA-TATTTTGATAACATGAATATTAAGCAGAGAATTAAAAGTGAAATGATATAGGACATAAAATTAAACCATTATACTCAACCATGAATATCGTCACAGTAATTGGTTATTTCTTAAGTAGCTATTCACGAGAAATAAGCAACCCTTGTTAGTAAGATACAACATTACCAGTTTCAGGCCCATTTAGTTTATAGCGTACATAACCTGATCTATTCTGGCCTCTGGTT…
CM-P4.11																											1									A--GTGTCCACGCACAAACTAACTACCTAAATTCTCTGCCGTGCCCAACAGAACAATACCCACAATACCTATCTATGTATTATTGTACATCTACTTATTTACCACTAGCATATGACCAGTAATGTTAACAGTTGATTTGGCCCTAAACATGAAAATT-ATTGAATCCACATAAA-TATTTTGATAACATGAATATTAAGCAGAGAATTAAAAGTGAAATGATATAGGACATAAAATTAAACCATTATACTCAACCATGAATATCGTCACAGTAATTGGTTATTTCTTAAGTAGCTATTCACGAGAAATAAGCAACCCTTGTTAGTAAGATACAACATTACCAGTTTCAGGCCCATTTAGTTTATAGCGTACATAACCTGATCTATTCTGGCCTCTGGTT…
CM-P5.1																									43											A--GTGTCCACGCACAAACTAACTACCTAAATTCTCTGCCGTGCCCAACAGAACAATACCCACAATACCTATCTATGTATTATTGTACATCTACTTATTTACCACTAGCATATGACCAGTAATGTTAACAGTTGATTTGGCCCTAAACATGAAAATT-ATTGAATCCACATAAA-TATTTTGATAACATGAATATTAAGCAGAGGATTAAAAGTGAAATGATATAGGACATAAAATTAAACCATTATACTCAACCATGAATATCGTCACAGTAATTGGTTATTTCTTAAGCAGCTATTCACGAGAAATAAGCAACCCTTGTTAGTAAGATACAACATTACCAGTTTCAGGCCCATTTAGTTTATAGCGTACATAACCTGATCTATTCTGGCCTCTGGTT…
CM-P6.1																								40												A--GTGTCCACGCACAAACTAACTACCTAAATTCTCTGCCGTGCCCAACAGAACAATACCCACAATACCTATCTATGTATTATTGTACATCTACTTATTTACCACTAGCATATGACCAGTAATGTTAACAGTTGATTTGGCCCTAAACATGAAAATT-ATTGAATCCACATAAA-TATTTTGATAACATGAATATTAAGCAGAGAATTAAAAGTGAAATGATATAGGACATAAAATTAAACCATTATACTCAACCATGAATATCGTCACAGTAATTGGTTATTTCTTAAGTAGCTATTCACGAGAAATAAGCAACCCTTGTTAGTAAGATACAACATTACCAGTTTCAGGCCCATTTAGTTTGTAGCGTACATAACCTGATCTATTCTGGCCTCTGGTT…
CM-P6.2																								2												A--GTGTCCACGCACAAACTAACTACCTAAATTCTCTGCCGTGCCCAACAGAACAATACCCACAATACCTATCTATGTATTATTGTACATCTACTTATTTACCACTAGCATATGACCAGTAATGTTAACAGTTGATTTGGCCCTAAACATGAAAATT-ATTGAATCCACATAAA-TATTTTGATAACATGAATATTAAGCAGAGAATTAAAAGTGAAATGATATAGGACATAAAATTAAACCATTATACTCAACCATGAATATCGTCACAGTAATTGGTTATTTCTTAAGTAGCTATTCACGAGAAATAAGCAACCCTTGTTAGTAAGATACAACATTACCAGTTTCAGGCCCATTTAGTTTGTAGCGTACATAACCTGATCTATTCTGGCCTCTGGTT…
CM-P7.1																									3											A--GTGTCCACGCACAAACTAACTACCTAAATTCTCTGCCGTGCCCAACAGAACAATACCCACAATACCTATCTATGTATTATTGTACATCTACTTATTTACCACTAGCATATGACCAGTAATGTTAACAGTTGATTTGGCCCTAAACATGAAAATT-ATTGAATCCACATAAA-TATTTTGATAACATGAATATTAAGCAGAGAATTAAAAGTGAAATGATATAGGACATAAAATTAAACCATTATACTCAACCATGAATATCGTCACAGTAATTGGTTATTTCTTAAATAGCTATTCACGAGAAATAAGCAACCCTTGTTAGTAAGATACAACATTACCAGTTTCAGGCCCATTTAGTTTATAGCGTACATAACCTGATCTATTCTGGCCTCTGGTT…
CM-P8.1																									1	3										A--GTGTCCACGCACAAACTAACTACCTAAATTCTCTGCCGTGCCCAACAGAACAATACCCACAATACCTATCTATGTATTATTGTACATCTACTTATTTACCACTAGCATATGACCAGTAATGTTAACAGTTGATTTGGCCCTAAACATGAAAATT-ATTGGATCCACATAAA-TATTTTGATAACATGAATATTAAGCAGAGAATTAAAAGTGAAATGATATAGGACATAAAATTAAACCATTATACTCAACCATGAATATCGTCACAGTAATTGGTTATTTCTTAAGTAGCTATTCACGAGAAATAAGCAACCCTTGTTAGTAAGATACAACATTACCAGTTTCAGGCCCATTTAGTTTATAGCGTACATAACCTGATCTATTCTGGCCTCTGGTT…
CM-P8.2																										2										A--GTGTCCACGCACAAACTAACTACCTAAATTCTCTGCCGTGCCCAACAGAACAATACCCACAATACCTATCTATGTATTATTGTACATCTACTTATTTACCACTAGCATATGACCAGTAATGTTAACAGTTGATTTGGCCCTAAACATGAAAATT-ATTGGATCCACATAAA-TATTTTGATAACATGAATATTAAGCAGAGAATTAAAAGTGAAATGATATAGGACATAAAATTAAACCATTATACTCAACCATGAATATCGTCACAGTAATTGGTTATTTCTTAAGTAGCTATTCACGAGAAATAAGCAACCCTTGTTAGTAAGATACAACATTACCAGTTTCAGGCCCATTTAGTTTATAGCGTACATAACCTGATCTATTCTGGCCTCTGGTT…
CM-P8.3																										5										AAAGTGTCCACGCACAAACTAACTACCTAAATTCTCTGCCGTGCCCAACAGAACAATACCCACAATACCTATCTATGTATTATTGTACATCTACTTATTTACCACTAGCATATGACCAGTAATGTTAACAGTTGATTTGGCCCTAAACATGAAAATT-ATTGGATCCACATAAA-TATTTTGATAACATGAATATTAAGCAGAGAATTAAAAGTGAAATGATATAGGACATAAAATTAAACCATTATACTCAACCATGAATATCGTCACAGTAATTGGTTATTTCTTAAGTAGCTATTCACGAGAAATAAGCAACCCTTGTTAGTAAGATACAACATTACCAGTTTCAGGCCCATTTAGTTTATAGCGTACATAACCTGATCTATTCTGGCCTCTGGTT…
CM-P9.1																								2												A--GTGTCCACGCACAAACTAACTACCTAAATTCTCTGCCGTGCCCAACAGAACAATACCCACAATACCTATCTATGTATTATTGTACATCTACTTATTTACCACTAGCATATGACCAGTAATGTTAACAGTTGATTTGGCCCTAAACATGAAAATT-ATTGAATCCACATAAA-TATTTTGGTAACATGAATATTAAGCAGAGAATTAAAAGTGAAATGATATAGGACATAAAATTAAACCATTATACTCAACCATGAATATCGTCACAGTAATTGGTTATTTCTTAAATAGCTATTCACGAGAAATAAGCAACCCTTGTTAGTAAGATACAACATTACCAGTTTCAGGCCCATTTAGTTTATAGCGTACATAACCTGATCTATTCTGGCCTCTGGTT…
CM-P11.1																								2												A--GTGTCCACGCACAAACTAACTACCTAAATTCTCTGCCGTGCCCAACAGAACAATACCCACAATACCTATCTATGTATTATTGTACATCTACTTATTTACCACTAGCATATGACCAGTAATGTTAACAGTTGATTTGGCCCTAAACATGAAAATT-ATTGAATCCACATAAA-TATTTTGATAACATGAATATTAAGCAGAGAATTAAAAGTGAAATGATATAGGACATAAAATTAAACCATTATACTCAACCATGAATATCGTCACAGTAATTGGTTATTTCTTAAATAGCTATTCACGAGAAATAAGCAACCCTTGTTAGTAAGATACAACATTACCAGTTTCAGGCCCATTTAGTTTGTAGCGTACATAACCTGATCTATTCTGGCCTCTGGTT…
CM-P12.1																									1											A--GTGTCCACGCACAAACTAACTACCTAAATTCTCTGCCGTGCCCAACAGAACAATACCCACAATACCTATCTATGTATTATTGTACATCTACTTATTTACCACTAGCATATGACCAGTAATGTTAACAGTTGATTTGGCCCTAAACATGAAAATT-ATTGAATCCACATAAA-TATTTTGATAACATGAATATTAAGCAGAGAATTAAAAGTGAAATGATATAGGACATAAAATTAAACCATTATACTCAACCATGAATATCGTCACAGTAATTGGTTATTTCTTAAGTAGCTATTCACGAGAAATAAGCAACCCTTGTTAGTAAGATACAACATTACCAGTTTCAGGCCCATTTAGTTTACAGCGTACATAACCTGATCTATTCTGGCCTCTGGTT…
CM-P13.1																								2												A--GTGTCCACGCACAAACTAACTACCTAAATTCTCTGCCGTGCCCAACAGAACAATACCCACAATACCTATCTATGTATTATTGTACATCTACTTATTTACCACTAGCATATGACCAGTAATGTTAACAGTTGATTTGGCCCTAAACATGAAAATT-ATTGAATCCACATAAA-TATTTTGATAACATGAATATTAAGCAGAGAATTAAAAGTGAAATGATATGGGACATAAAATTAAACCATTATACTCAACCATGAATATCGTCACAGTAATTGGTTATTTCTTAAGTAGCTATTCACGAGAAATAAGCAACCCTTGTTAGTAAGATACAACATTACCAGTTTCAGGCCCATTTAGTTTATAGCGTACATAACCTGATCTATTCTGGCCTCTGGTT…
CM-P14.1																								2												A--GTGTCCACGCACAAACTAACTACCTAAATTCTCTGCCGTGCCCAACAGAACAATACCCACAATACCTATCTATGTATTATTGTACATCTACTTATTTACCACTAGCATATGACCAGTAATGTTAACAGTTGATTTGGCCCTAAACATGAAAATT-ATTGAATCCACATAAA-TATTTTGACAACATGAATATTAAGCAGAGAATTAAAAGTGAAATGATATAGGACATAAAATTAAACCATTATACTCAACCATGAATATCGTCACAGTAATTGGTTATTTCTTAAGTAGCTATTCACGAGAAATAAGCAACCCTTGTTAGTAAGATACAACATTACCAGTTTCAGGCCCATTTAGTTTGTAGCGTACATAACCTGATCTATTCTGGCCTCTGGTT…
CM-P15.1																											3									A--GTGTCCACGCACAAACTAACTACCTAAATTCTCTGCCGTGCCCAACAGAACAATACCCACAATACCTATCTATGTATTATTGTACATCTACTTATTTACCACTAGCATATGACCAGTAATGTTAACAGTTGATTTGGCCCTAAACATGAAAATT-ATTGGATCCACATAAA-TATTTTGATAACATGAATATTAAGCAGAGAATTAAAAGTGAAATGATATAGGACATAAAATTAAACCATTATACTCAACCATGAATATCGTCACAGTAATTGGTTATTTCTTAAGTAGCTATTCACGAGAAATAAGCAACCCTTGTTAGTAAGATACAACATTACCAGTTTCAGGCCCATTTAGTTTATAGCGTACATAACCTGATCTATTCTGGCCTCTGGTT…
CM-P17.1																											4									A--GTGTCCACGCACAAACTAACTACCTAAATTCTCTGCCGTGCCCAACAGAACAATACCCACAATACCTATCTATGTATTATTGTACATCTACTTATTTACCACTAGCATATGACCAGTAATGTTAACAGTTGATTTGGCCCTAAACATGAAAATT-ATTGAATCCACATAAA-TATTTTGATAACATGAATATTAAGCAGAGAATTAAAAGTGAAATGATATAGGACATAAAATTAAACCATTATACTCAACCATGAATATCGTCACAGTAATTGGTTATTTCTTAAGTAGCTATTCACGAGAAATAAGCAACCCTTGTTAGTAAGATACAACATTACCAGTTTCAGGCCCATTTAGTTTATAACGTACATAACCTGATCTATTCTGGCCTCTGGTT…
CM-P17.2																										1										A--GTGTCCACGCACAAACTAACTACCTAAATTCTCTGCCGTGCCCAACAGAACAATACCCACAATACCTATCTATGTATTATTGTACATCTACTTATTTACCACTAGCATATGACCAGTAATGTTAACAGTTGATTTGGCCCTAAACATGAAAATT-ATTGAATCCACATAAA-TATTTTGATAACATGAATATTAAGCAGAGAATTAAAAGTGAAATGATATAGGACATAAAATTAAACCATTATACTCAACCATGAATATCGTCACAGTAATTGGTTATTTCTTAAGTAGCTATTCACGAGAAATAAGCAACCCTTGTTAGTAAGATACAACATTACCAGTTTCAGGCCCATTTAGTTTATAACGTACATAACCTGATCTATTCTGGCCTCTGGTT…
CM-P18.1																															2					A--GTGTCCACGCACAAACTAACTACCTAAATTCTCTGCCGTGCCCAACAGAACAATACCCACAATACCTATCTATGTATTATTGTACATCTACTTATTTACCACTAGCATATGACCAGTAATGTTAACAGTTGATTTGGCCCTAAACATGAAAATT-ATTGAATCCACATAAA-TATTTTAGTAACATGAATATTAAGCAGAGAATTAAAAGTGAAATGATATAGGACATAAAATTAAACCATTATACTCAACCATGAATATCGTCACAGTAATTGGTTATTTCTTAAGTAGCTATTCACGAGAAATAAGCAACCCTTGTTAGTAAGATACAACATTACCAGTTTCAGGCCCATTTAGTTTATAACGTACATAACCTGATCTATTCTGGCCTCTGGTT…
CM-P19.1																															55					A--GTGTCCACGCACAAACTAACTACCTAAATTCTCTGCCGTGCCCAACAGAACAATACCCACAATACCTATCTATGTATTATTGTACATCTACTTATTTACCACTAGCATATGACCAGTAATGTTAACAGTTGATTTGGCCCTAAACATGAAAATT-ATTGAATCCACATAAA-TATTTTAATAACATGAATATTAAGCAGAGAATTAAAAGTGAAATGATATAGGACATAAAATTAAACCATTATACTCAACCATGAATATCGTCACAGTAATTGGTTATTTCTTAAATAGCTATTCACGAGAAATAAGCAACCCTTGTTAGTAAGATACAACATTACCAGTTTCAGGCCCATTTAGTTTATAGCGTACATAACCTGATCTATTCTGGCCTCTGGTT…
CM-P20.1																46	276	29	16	91		15						1					1			A--GTGTCCACGCACAAACTA----CCTAAATTCTCTGCCGTGCCCAACAGAACAATACCCACAATACCTATCTATGTATTATTGTACATCTACTTATTTACCACTAGCATATGACCAGTAATGTTAACAGTTGATTTGGCCCTAAACATGAAAATT-ATTGAGTTTGCATAAA-CATTTTAATAACATGAATATTAAGCAGAGAATTAAAAGTGAAATGATATAGGACATAAAATTAAACCATTATACTCAACCATGAATATTGTCACAGTAATTGGTTATTTCTTAAATAGCTATTCACGAGAAATAAGCAACCCTTGTTAGTAAGATACAACATTACCAGTTTCAAGCCCATTCAATTTGTGGCGTACATAATTTGATCTATTCTGGCCTCTGGTT…
CM-P20.2																	2	6																		A--GTGTCCACGCACAAACTA----CCTAAATTCTCTGCCGTGCCCAACAGAACAATACCCACAATACCTATCTATGTATTATTGTACATCTACTTATCTACCACTAGCATATGACCAGTAATGTTAACAGTTGATTTGGCCCTAAACATGAAAATT-ATTGAGTTTGCATAAA-CATTTTAATAACATGAATATTAAGCAGAGAATTAAAAGTGAAATGATATAGGACATAAAATTAAACCATTATACTCAACCATGAATATTGTCACAGTAATTGGTTATTTCTTAAATAGCTATTCACGAGAAATAAGCAACCCTTGTTAGTAAGATACAACATTACCAGTTTCAAGCCCATTCAATTTGTGGCGTACATAATTTGATCTATTCTGGCCTCTGGTT…
CM-P20.3																	10																			A--GTGTCCACGCACAAACTA----CCCAAATTCTCTGCCGTGCCCAACAGAACAATACCCACAATACCTATCTATGTATTATTGTACATCTACTTATTTACCACTAGCATATGACCAGTAATGTTAACAGTTGATTTGGCCCTAAACATGAAAATT-ATTGAGTTTGCATAAA-CATTTTAATAACATGAATATTAAGCAGAGAATTAAAAGTGAAATGATATAGGACATAAAATTAAACCATTATACTCAACCATGAATATTGTCACAGTAATTGGTTATTTCTTAAATAGCTATTCACGAGAAATAAGCAACCCTTGTTAGTAAGATACAACATTACCAGTTTCAAGCCCATTCAATTTGTGGCGTACATAATTTGATCTATTCTGGCCTCTGGTT…
CM-P20.4																	16																			A--GTGTCCACGCACAAACTA----CCTAAATTCTCTGCCGTGCCCAACAGAACAATACCCACAATACCTATCTATGTATTATTGTACATCTACTTACTTACCACTAGCATATGACCAGTAATGTTAACAGTTGATTTGGCCCTAAACATGAAAATT-ATTGAGTTTGCATAAA-CATTTTAATAACATGAATATTAAGCAGAGAATTAAAAGTGAAATGATATAGGACATAAAATTAAACCATTATACTCAACCATGAATATTGTCACAGTAATTGGTTATTTCTTAAATAGCTATTCACGAGAAATAAGCAACCCTTGTTAGTAAGATACAACATTACCAGTTTCAAGCCCATTCAATTTGTGGCGTACATAATTTGATCTATTCTGGCCTCTGGTT…
CM-P22.1																	1			22	10	41														A--GTGTCCACGCACAAACTA----CCTAAATTCTCTGCCGTGCCCAACAGAACAATACCCACAATACCTATCTATGTATTATTGTACATCTACTTATTTACCACTAGCATATGACCAGTAATGTTAACAGTTGATTTGGCCCTAAACATGAAAATT-ATTGAGTTTGCATAAA-CATTTTAATAACATGAATATTAAGCAGAGAATTAAAAGTGAAATGATATAGGACATAAAATTAAACCATTATACTCAACCATGAATATTGTTACAGTAATTGGTTATTTCTTAAATAGCTATTCACGAGAAATAAGCAACCCTTGTTAGTAAGATACAACATTACCAGTTTCAAGCCCATTCAATTTGTGGCGTACATAATTTGATCTATTCTGGCCTCTGGTT…
CM-P24.1																											1									A--GTGTCCACGCACAAACTAACTACCTAAATTCTCTGCCGTGCCCAACAGAACAATACCCACAATACCTATCTATGTATTATTGTACATCTACTTATTTACCACTAGCATATGACCAGTAATGTTAACAGTTGATTTGGCCCTAAACATGAAAATT-ATTGAATCCACATAAA-TATTTTGATAACATGAATATTAAGCAGAGAATTAAAAGTGAAATGATATAGGACATAAAATTAAACCATTATACTCAACCATGAATATCGTCACAGTAATTGGTTATTTCTTAAGTAGCTATTCACGAGAAATAAGCAACCCTTGTTAGTAAGATACAACATTACCAGTTTCAGGCCCATTTAATTTATAGCGTACATAACCTGATCTATTCTGGCCTCTGGTT…
CM-P31.1														2																						A--GTGTCCACGCACAAACTAACTACCTAAATTCTCTGCCGTGCCCAACAGAACAATACCCACAATACCTATCTATGTATTATTGTACATCTACTTATTTACCACTAGCATATGACCAGTAATGTTAACAGTTGATTTGGCCCTAAACATGAAAATT-ATTAAATTTGCATAAA-TATTTTAATAACATGAATATTAAGCAGAGAATTAAAAGTGAAATGATATAGGACATAAAATTAAACCATTATACTCAACCATGAATATTGTCACGGTAATTGGTTATTTCTTAAATAACTATTCACGAGAAATAAGCAACCCTTGTTGGTAAGATACAACATTACCAGTTTCAAGCCCATTTAGTTTATAGCGTACATAATTTGATCTATTCTGGCCTCTGGTT…
CM-P32.1																	84			12																A--GTGTCCACGCACAAACTA----CCTAAATTCTCTGCCGTGCCCAACAGAACAATACCCACAATACCTATCTATGTATTATTGTACATCTACTTATTTACCACTAGCATATGACCAGTAATGTTAACAGTTGATTTGGCCCTAAACATGAAAATT-ATTGAGTTTACATAAA-CATTTTAATAACATGAATATTAAGCAGAGAATTAAAAGTGAAATGATATAGGACATAAAATTAAACCATTATACTCAACCATGAATATTGTCACAGTAATTGGTTATTTCTTAAATAGCTATTCACGAGAAATAAGCAACCCTTGTTAGTAAGATACAACATTACCAGTTTCAAGCCCATTCAATTTGTGACGTACATAATTTGATCTATTCTGGCCTCTGGTT…
CM-P33.1																						1														A--GTGTCCACGCACAAACTA----CCTAAATTCTCTGCCGTGCCCAACAGAACAATACCCACAATACCTATCTATGTATTATTGTACATCTACTTATTTACCACTAGCATATGACCAGTAATGTTAACAGTTGATTTGGCCCTAAACATGAAAATT-ATTGAATTTGCATAAA-CATTTTAATAACATGAATATTAAGCAGAGAATTAAGAGTGAAATGATATAGGACATAAAATTAAACCATTATACTCAACCATGAATATTGTCACAGTAATTGGTTATTTCTTAAATAGCTATTCACGAGAAATAAGCAACCCTTGTTAGTAAGATACAACATTACCAGTTTCAAGCCCATTCAATTTGTGGCGTACATAATCTGATCTATTCTGGCCTCTGGTT…
CM-P39.1																																	19	32	18	A--GTGTCCACGCACAAACTAACTACCTAAATTCTCTGCCGTGCCCAACAGAACAATACCCACAATACCTATCTATGTATTATTGTACATCTACTTATTTACCACTAGCATATGACCAGTAATGTTAACAGTTGATTTGGCCCTAAACATAAAAATT-ATTAAATTTGCATAAAATATTTTAATAACATGAATATTAAGCAGAGAGTTAAAAGTGAAATGATATAGGACATAAAATTAAACCATTATACTCAACCATGAATATTGTCACAGTAATTGGTTATTTCTTAAATAGCTATTCACGAGAAATAAGCAACCCTTGTTAGTAAGATACAACATTACCAGTTTCAGGCCCATTCAGTTTGTGGCGTACATAACTTGATCTATTCTGGCCTCTGGTT…
CM-P39.2																																				AAAGTGTCCACGCACAAACTAACTACCTAAATTCTCTGCCGTGCCCAACAGAACAATACCCACAATACCTATCTATGTATTATTGTACATCTACTTATTTACCACTAGCATATGACCAGTAATGTTAACAGTTGATTTGGCCCTAAACATAAAAATT-ATTAAATTTGCATAAAATATTTTAATAACATGAATATTAAGCAGAGAGTTAAAAGTGAAATGATATAGGACATAAAATTAAACCATTATACTCAACCATGAATATTGTCACAGTAATTGGTTATTTCTTAAATAGCTATTCACGAGAAATAAGCAACCCTTGTTAGTAAGATACAACATTACCAGTTTCAGGCCCATTCAGTTTGTGGCGTACATAACTTGATCTATTCTGGCCTCTGGTT…
CM-P40.1																																				A--GTGTCCACGCACAAACTAACTACCTAAATTCTCTGCCGTGCCCAACAGAACAATACCCACAATACCTATCTATGTATTATTGTACATCTACTTATTTACCACTAGCATATGACCAGTAATGTTAACAGTTGATTTGGCCCTAAACATGAAAATT-ATTGAATTCACATAAA-TATTTTAATAACATGAATATTAAGCAGAGAATTAAAAGTGAAATGATATAGGACATAAAATTAAACCATTATACTCAACCATGAATATCGTCACAGTAATTGGTTATTTCTTAAGTAGCTATTCACGAGAAATAAGCAACCCTTGTTAGTAAGATACAACATTACCAGTTTCAGGCCCATTTAGTTTATAGCGTACATAACCTGATCTATTCTGGCCTCTGGTT…
CM-P44.1											46			4																						A--GTGTCCACGCACAAACTAACTACCTAAATTCTCTGCCGTGCCCAACAGAACAATACCCACAATACCTATCTATGTATTATTGTACATCTACTTATTTACCACTAGCATATGACCAGTAATGTTAACAGTTGATTTGGCCCTAAACATGAAAATT-ATTAAATTTGCATAAA-TGTTTTAATAACATGAATATTAAGCAGAGAATTAAAAGTGAAATGATATAGGACATAAAATTAAACCATTATACTCAACCATGAATATTGTTACGGTAATTGGTTATTTCTTAAATAACTATTCACGAGAAATAAGCAACCCTTGTTGGTAAGATACAACATTACCAGTTTCAAGCCCATTTAGTTTATAGCGTACATAATTTGATCTATTCTGGCCTCTGGTT…
CM-P44.2														2																						A--GTGTCCACGCACAAACTAACTACCTAAATTCTCTGCCGTGCCCAACAGAACAATACCCACAATACCTATCTATGTATTATTGTGCATCTACTTATTTACCACTAGCATATGACCAGTAATGTTAACAGTTGATTTGGCCCTAAACATGAAAATT-ATTAAATTTGCATAAA-TGTTTTAATAACATGAATATTAAGCAGAGAATTAAAAGTGAAATGATATAGGACATAAAATTAAACCATTATACTCAACCATGAATATTGTTACGGTAATTGGTTATTTCTTAAATAACTATTCACGAGAAATAAGCAACCCTTGTTGGTAAGATACAACATTACCAGTTTCAAGCCCATTTAGTTTATAGCGTACATAATTTGATCTATTCTGGCCTCTGGTT…
CM-P44.4											1																									A--GTGTCCACGCACAAACTAACTACCTAAATTCTCTGCCGTGCCCAACAGAACAATACCCACAATACCTATCTATGTATTATTGTACATCTACTTATTTACCACTAGCATATGACCAGTAATGTTAACAGTTGATTTGGCCCTAAACATGAAAATT-ATTAAATTTGCATAAA-TGTTTTAATAACATGAATATTAAGCAGAGAATTAAAAGTGAAATGATATAGGACATAAAATTAAACCATTATACTCAACCATGAATATTGTTACGGTAATTGGTTATTTCTTAAATAACTATTCACGAGAAATAAGCAACCCTTGTTGGTAAGATACAACATTACCAGTTTCAAGCCCATTTAGTTTATAGCGTACATAATTTGATCTATTCTGGCCTCTGGTT…
CM-P44.5											1																									A--GTGTCCACGCACAAACTAACTACCTAAATTCTCTGCCGTGCCCAACAGAACAATACCCACAATACCTATCTATGTATTATTGTACATCTACTTATTTACCACTAGCATATGACCAGTAATGTTAACAGTTGATTTGGCCCTAAACATGAAAATT-ATTAAATTTGCATAAA-TGTTTTAATAACATGAATATTAAGCAGAGAATTAAAAGTGAAATGATATAGGACATAAAATTAAACCATTATACTCAACCATGAATATTGTTACGGTAATTGGTTATTTCTTAAATAACTATTCACGAGAAATAAGCAACCCTTGTTGGTAAGATACAACATTACCAGTTTCAAGCCCATTTAGTTTATAGCGTACATAATTTGATCTATTCTGGCCTCTGGTT…
CM-P47.1											2	93	36	2							1	3									1					A--GTGTCCACGCACAAACTA----CCTAAATTCTCTGCCGTGCCCAACAGAACAATACCCACAATACCTATCTATGTATTATTGTACATCTACTTATTTACCACTAGCATATGACCAGTAATGTTAACAGTTGATTTGGCCCTAAACATGAAAATT-ATTGAATTTGCATAAA-CATTTTAATAACATGAATATTAAGCAGAGAATTAAAAGTGAAATGATATAGGACATAAAATTAAACCATTATACTCAACCATGAATATTGTCACAGTAATTGGTTATTTCTTAAATAGCTATTCACGAGAAATAAGCAACCCTTGTTAGTAAGATACAACATTACCAGTTTCAAGCCCATTCAATTTGTGGCGTACATAATCTGATCTATTCTGGCCTCTGGTT…
CM-P47.2															5																					A--GTGTCCACGCACAAATTA----CCTAAATTCTCTGCCGTGCCCAACAGAACAATACCCACAATACCTATCTATGTATTATTGTACATCTACTTATTTACCACTAGCATATGACCAGTAATGTTAACAGTTGATTTGGCCCTAAACATGAAAATT-ATTGAATTTGCATAAA-CATTTTAATAACATGAATATTAAGCAGAGAATTAAAAGTGAAATGATATAGGACATAAAATTAAACCATTATACTCAACCATGAATATTGTCACAGTAATTGGTTATTTCTTAAATAGCTATTCACGAGAAATAAGCAACCCTTGTTAGTAAGATACAACATTACCAGTTTCAAGCCCATTCAATTTGTGGCGTACATAATCTGATCTATTCTGGCCTCTGGTT…
CM-P47.3															1																					A--GTGTCCACGCACAAACTA----CCTAAATTCTCTGCCGTGCCCAACAGAACAATACCCACAATACCTATCTATGTATTATTGTACATCTACTTATTTACCACTAGCATATGACCAGTAATGTTAACAGTTGATTTGGCCCTAAACATGAAAATT-ATTGAATTTGCATAAA-CATTTTAATAACATGAATATTAAGCAGAGAATTAAAAGTGAAATGATATAGGACATAAAATTAAACCATTATACTCAACCATGAATATTGTCACAGTAATTGGTTATTTCTTAAATAGCTATTCACGAGAAATAAGCAACCCTTGTTAGTAAGATACAACATTACCAGTTTCAAGCCCATTCAATTTGTGGCGTACATAATCTGATCTATTCTGGCCTCTGGTT…
CM-P49.1													1			1			1										26	28	2		4		3	A--GTGTCCACGCACAAACTAACTACCTAAATTCTCTGCCGTGCCCAACAGAACAATACCCACAATACCTATCTATGTATTATTGTACATCTACTTATTTACCACTAGCATATGACCAGTAATGTTAACAGTTGATTTGGCCCTAAACATGAAAATT-ATTGAATCCACATAAA-TATTTTAATAACATGAATATTAAGCAGAGAATTAAAAGTGAAATGATATAGGACATAAAATTAAACCATTATACTCAACCATGAATATCGTCACAGTAATTGGTTATTTCTTAAGTAGCTATTCACGAGAAATAAGCAACCCTTGTTAGTAAGATACAACATTACCAGTTTCAGGCCCATTTAGTTTATAGCGTACATAACCTGATCTATTCTGGCCTCTGGTT…
CM-P49.3																																				AAAGTGTCCACGCACAAACTAACTACCTAAATTCTCTGCCGTGCCCAACAGAACAATACCCACAATACCTATCTATGTATTATTGTACATCTACTTATTTACCACTAGCATATGACCAGTAATGTTAACAGTTGATTTGGCCCTAAACATGAAAATT-ATTGAATCCACATA-AATATTTTAATAACATGAATATTAAGCAGAGAATTAAAAGTGAAATGATATAGGACATAAAATTAAACCATTATACTCAACCATGAATATCGTCACAGTAATTGGTTATTTCTTAAGTAGCTATTCACGAGAAATAAGCAACCCTTGTTAGTAAGATACAACATTACCAGTTTCAGGCCCATTTAGTTTATAGCGTACATAACCTGATCTATTCTGGCCTCTGGTT…
CM-P50.1																																6	34	5	6	A--GTGTCCACGCACAAACTAACTACCTAAATTCTCTGCCGTGCCCAACAGAACAATACCCACAATACCTATCTATGTATTATTGTACATCTACTTATTTACCACTAGCATATGACCAGTAATGTTAACAGTTGATTTGGCCCTAAACATGAAAATT-ATTGAATCCACATAAA-TATTTTAATAACATGAATGTTAAGCAGAGAATTAAAAGTGAAATGATATAGGACATAAAATTAAACCATTATACTCAACCATGAATATCGTCACAGTAATTGGTTATTTCTTAAGTAGCTATTCACGAGAAATAAGCAACCCTTGTTAGTAAGATACAACATTACCAGTTTCAGGCCCATTTAGTTTATAGCGTACATAACCTGATCTATTCTGGCCTCTGGTT…
CM-P51.1																																				AAAGTGTCCACGCACAAACTAACTACCTAAATTCTCTGCCGTGCCCAACAGAACAATACCCACAATACCTATCTATGTATTATTGTACATCTACTTATTTACCACTAGCATATGACCAGTAATGTTAACAGTTGATTTGGCCCTAAACATAAAAATT-ATTAAATTTACATAAAATATTTTAATAACATGAATATTAAGCAGAGAGTTAAAAGTGAAATGATATAGGACATAAAATTAAACCATTATACTCAACCATGAATATTGTCACAGTAATTGGTTATTTCTTAAATAGCTATTCACGAGAAATAAGCAACCCTTGTTAGTAAGATACAACATTACCAGTTTCAGGCCCATTCAGTTTGTGGCGTACATAACTTGATCTATTCTGGCCTCTGGTT…
CM-P53.1																																2	6	2	2	A--GTGTCCACGCACAAACTAACTACCTAAATTCTCTGCCGTGCCCAACAGAACAATACCCACAATACCTATCTATGTATTATTGTACATCTACTTATTTACCACTAGCATATGACCAGTAATGTTAACAGTTGATTTGGCCCTAAACATGAAAATT-ATTGAATCCACATAAA-TATTTTAATAACATGAATATTAAGCAGAGAATTAAAAGTGAAATGATATAGGACATAAAATTAAACCATTATACTCAACCATGAATATCGTCACAGTAATTGGTTATTTCTTAAGTAGCTATTCACGAGAAATAAGCAACCCTTGTTAGTAAGATACAACATTACCAGTTTCAGGCCCATTTAGTTTATAGCGTACATAACCTGATCTATTCTGGCCTCTGGTT…
CM-P54.1																																4		2	1	A--GTGTCCACGCACAAACTA----CCTAAATTCTCTGCCGTGCCCAACAGAACAATACCCACAATACCTATCTATGTATTATTGTACATCTACTTATTTACCACTAGCATATGACCAGTAATGTTAACAGTTGATTTGGCCCTAAACATGAAAATT-ATTGAGTTTGCATAAA-CATTTTAATAACATGAATATTAAGCAGAGAATTAAAAGTGAAATGATATAGGACATAAAATTAAACCATTATACTCAACCATGAATATTGTCACAGTAATTGGTTATTTCTTAAATAGCTATTCACGAGAAATAAGCAACCCTTGTTAGTAAGATACAACATTACCAGTTTCAAGCCCATTCAATTTGTGGCGTACATAATTTGATCTATTCTGGCCTCTGGTT…
CM-P54.2																																1				A--GTGTCCACGCACAAACTA----CCTAAATTCTCTGCCGTGCCCAACAGAACAATACCCACAATACCTATCTATGTATTATTGTACATCTACTTATTTACCACTAGCATATGACCAGTAATGTTAACAGTTGATTTGGCCCTAAACATGAAAATT-ATTGAGTTTGCATAAA-CATTTTAATAACATGAATATTAAGCAGAGAATTAAAAGTGAAATGATATAGGACATAAAATTAAACCATTATACTCAACCATGAATATTGTCACAGTAATTGGTTATTTCTTAAATAGCTATTCACGAGAAATAAGCAACCCTTGTTAGTAAGATACAACATTACCAGTTTCAAGCCCATTCAATTTGTGGCGTACATAATTTGATCTATTCTGGCCTCTGGTT…
CM-P56.1																						8														A--GTGTCCACGCACAAACTAACTACCTAAATTCTCTGCCGTGCCCAACAGAACAATACCCACAATACCTATCTATGTATTATTGTACATCTACTTATCTACCACTAGCATATGACCAGTAATGTTAACAGTTGATTTGGCCCTAAACATAAAAATT-ATTGAATTCACATAAA-TATTTCAATGGCATGAATATTAAGCAGAGAATTAAAAGTGAAATGATATAGGACATAAAATTAAACCATTATACTCAACCATGAATATTGTCACAGTAATTGGTTATTTCTTAAATAGCTATTCACGAGAAATAAGCAATCCTTGTTAGTAAGATACAACATTACCAGTTTCAGGCCCATTCAATTTGTAGCGTACATAATTTGATCTATTCTGGCCTCTGGTT…
CM-P57.1																													1		1					A--GTGTCCACGCACAAACTAACTACCTAAATTCTCTGCCGTGCCCAACAGAACAATACCCACAATACCTATCTATGTATTATTGTACATCTACTTATTTACCACTAGCATATGACCAGTAATGTTAACAGTTGATTTGGCCCTAAACATGAAAATT-ATTGAATCCACATAAA-TATTTTAGTAACATGAATATTAAGCAGAGAATTAAAAGTGAAATGATATAGGACATAAAATTAAACCATTATACTCAACCATGAATATCGTCACAGTAATTGGTTATTTCTTAAGTAGCTATTCACGAGAAATAAGCAACCCTTGTTAGTAAGATACAACATTACCAGTTTCAGGCCCATTTAGTTTATAGCGTACATAACCTGATCTATTCTGGCCTCTGGTT…
CM-P57.2																						1														A--GTGTCCACGCACAAACTAACTACCTAAATTCTCTGCCGTGCCCAACAGAACAATACCCACAATACCTATCTATGTATTATTGTACATCTACTTATTTACCACTAGCATATGACCAGTAATGTTAACAGTTGATTTGGCCCTAAACATGAAAATT-ATTGAATCCACATAAA-TATTTTAGTAACATGAATATTAAGCAGAGAATTAAAAGTGAAATGATATAGGACATAAAATTAAACCATTATACTCAACCATGAATATCGTCACAGTAATTGGTTATTTCTTAAGTAGCTATTCACGAGAAATAAGCAACCCTTGTTAGTAAGATACAACATTACCAGTTTCAGGCCCATTTAGTTTATAGCGTACATAACCTGATCTATTCTGGCCTCTGGTT…
CM-P61.1																	76			1																A--GTGTCCACGCACAAACTA----CCTAAATTCTCTGCCGTGCCCAACAGAACAATACCCACAATACCTATCTATGTATTATTGTACATCTACTTATTTACCACTAGCATATGACCAGTAATGTTAACAGTTGATTTGGCCCTAAACATGAAAATT-ATTGAGTTTACATAAA-CATTTTAATAACATGAATATTAAGCAGAGAATTAAAAGTGAAATGATATAGGACATAAAATTAAACCATTATACTCAACCATGAATATTGTCACAGTAATTGGTTATTTCTTAAATAGCTATTCACGAGAAATAAGCAACCCTTGTTAGTAAGATACAACATTACCAGTTTCAAGCCCATTCAATTTGTGGCGTACATAATTTGATCTATTCTGGCCTCTGGTT…
CM-P65.1																				1	4	141														A--GTGTCCACGCACAAACTAACTACCTAAATTCTCTGCCGTGCCCAACAGAACAATACCCACAATACCTATCTATGTATTATTGTACATCTACTTATCTACCACTAGCATATGACCAGTAATGTTAACAGTTGATTTGGCCCTAAACATAAAAATT-ATTGAATTCACATAAA-TATTTCAATGGCATGAATATTAAGCAGAGAATTAAAAGTGAAATGATATAGGACATAAAATTAAACCATTATACTCAACCATGAATATTGTCACAGTAATTGGTTATTTCTTAAATAGCTATTCACGAGAAATAAGCAATCCTTGTTAGTAAGATACAACATTACCAGTTTCAGGCCCATTCAATTTGTGGCGTACATAATTTGATCTATTCTGGCCTCTGGTT…
CM-P65.2																					2	13														A--GTGTCCACGCACAAACTAACTACCTAAATTCTCTGCCGTGCCCAACAGAACAATACCCACAATACCTATCTATGTATTATTGTACATCTACTTATCTACCACTAGCATATGACCAGTAATGTTAACAGTTGATTTGGCCCTAAACATAAAAATT-ATTGAATTCACATAAA-TATTTCAATGGCATGAATATTAAGCAGAGAATTAAAAGTGAAATGATATAGGACATAAAATTAAACCATTATACTCAACCATGAATATTGTCACAGTAATTGGTTATTTCTTAAATAGCTATTCACGAGAAATAAGCAATCCTTGTTAGTAAGATACAACATTACCAGTTTCAGGCCCATTCAATTTGTGGCGTACATAATTTGATCTATTCTGGCCTCTGGTT…
CM-P67.1																	2																			A--GTGTCCACGCACAAACTA----CCTAAATTCTCTGCCGTGCCCAACAGAACAATACCCACAATACCTATCTATGTATTATTGTACATCTACTTATTTACCACTAGCATATGACCAGTAATGTTAACAGTTGATTTGGCCCTAAACATGAAAATT-ATTGAATTTGCATAAA-CATTTTAATAACATGAATATTAAGCAGAGAATTAAAAGTGAAATGATATAGGACATAAAATTAAACCATTATACTCAACCATGAATATTGTCACAGTAATTGGTTATTTCTTAAATAGCTATTCACGAGAAATAAGCAACCCTTGTTAGTAAGATACAACATTACCAGTTTCAAGCCCATTCAATTTGTGGCGTACATAATTTGATCTATTCTGGCCTCTGGTT…
CM-P68.1											2	1																								A--GTGTCCACGCACAAACTAACTACCTAAATTCTCTGCCGTGCCCAACAGAACAATACCCACAATACCTATCTATGTATTATTGTACATCTACTTATCTACCACTAGCATATGACCAGTAATGTTAACAGTTGATTTGGCCCTAAACATAAAAATT-ATTAAATTCACATAAA-TATTTTAATGGCATGAATATTAAGCAGAGAATTAAAAGTGAAATGATATAGGACATAAAATTAAACCATTATACTCAACCATGAATATTGTCACGGTAATTGGTTATTTCCTAAATAGCTATTCACGAGAAATAAGCAACCCTTGTTAGTAAGATACAACATTACCAGTTTCAGGCCCATTCAGTTTGTGACGTACATAACTTGATCTATTCTGGCCTCTGGTT…
CM-P70.1																																	3	1	1	A--GTGTCCACGCACAAACTAACTACCTAAATTCTCTGCCGTGCCCAACAGAACAATACCCACAATACCTATCTATGTATTATTGTACATCTACTTATTTACCACTAGCATATGACCAGTAATGTTAACAGTTGATTTGGCCCTAAACATAAAAATT-ATTAAATTTGCATAAAATATTTTAATAACATGAATATTAAGCAGAGAATTAAAAGTGAAATGATATAGGACATAAAATTAAACCATTATACTCAACCATGAATATTGTCACAGTAATTGGTTATTTCTTAAATAGCTATTCACGAGAAATAAGCAACCCTTGTTAGTAAGATACAACATTACCAGTTTCAGGCCCATTCAGTTTGTGGCGTACATAACTTGATCTATTCTGGCCTCTGGTT…
CM-P75.1																															1					A--GTGTCCACGCACAAACTAACTACCTAAATTCTCTGCCGTGCCCAACAGAACAATACCCACAATACCTATCTATGTATTATTGTACATCTACTTATTTACCACTAGCATATGACCAGTAATGTTAACAGTTGATTTGGCCCTAAACATGAAAATT-ATTGAATCCACATAAA-TATTTTAATAACATGAATATTAAGCAGAGAATTAAAAGTGAAATGATATAGGACATAAAATTAAACCATTATACTCAACCATGAATATCGTCACAGTAATTGGTTATTTCTTAAGTAGCTATTCACGAGAAATAAGCAACCCTTGTTAGTAAGATACAACATTACCAGTTTCAGGCCCATTTAGTTTATAGCGTACATAACCTGATCTATTCTGGCCTCTGGTT…
CM-P77.1																	68			1																A--GTGTCCACGCACAAACTA----CCTAAATTCTCTGCCGTGCCCAACAGAACAATACCCACAATACCTATCTATGTATTATTGTACATCTACTTATTTACCACTAGCATATGACCAGTAATGTTAACAGTTGATTTGGCCCTAAACATGAAAATT-ATTGAATTTGCATAAA-CATTTTAATAACATGAATATTAAGCAGAGAATTAAAAGTGAAATGATATAGGACATAAAATTAAACCATTATACTCAACCATGAATATTGTCACAGTAATTGGTTATTTCTTAAATAGCTATTCACGAGAAATAAGCAACCCTTGTTAGTAAGATACAACATTACCAGTTTCAAGCCCATTCAATTTGTGGCGTACATAATATGATCTATTCTGGCCTCTGGTT…
CM-P79.1																																		1	1	A--GTGTCCACGCACAAACTAACTACCTAAATTCTCTGCCGTGCCCAACAGAACAATACCCACAATACCTATCTATGTATTATTGTACATCTACTTATTTACCACTAGCATATGACCAGTAATGTTAACAGTTGATTTGGCCCTAAACATAAAAATT-ATTAAATTTGCATAAAATATTTTAATAACATGAATATTAAGCAGAGAGTTAAAAGTGAAATGATATAGGACATAAAATTAAACCATTATACTCAACCATGAATATTGTCACAGTAATTGGTTATTTCTTAAATAGCTATTCACGAGAAATAAGCAACCCTTGTTAGTAAGATACAACATTACCAGTTTCAGGCCCATTCAGTTTGTGGCGTACATAACTTGATCTATTCTGGCCTCTGGTT…
CM-P80.1											3	8	9	5																						A--GTGTCCACGCACAAACTAACTACCTAAATTCTCTGCCGTGCCCAACAGAACAATACCCACAATACCTATCTATGTATTATTGTACATCTACTTATTTACCACTAGCATATGACCAGTAATGTTAACAGTTGATTTGGCCCTAAACATGAAAATT-ATTAAATTTGCATAAA-TGTTTTAATAACATGAATATTAAGCAGAGAATTAAAAGTGAAATGATATAGGACATAAAATTAAACCATTATACTCAACCATGAATATTGTCACGGTAATTGGTTATTTCTTAAATAACTATTCACGAGAAATAAGCAACCCTTGTTGGTAAGATACAACATTACCAGTTTCAAGCCCATTTAGTTTATAGCGTACATAATTTGATCTATTCTGGCCTCTGGTT…
CM-P81.1											7																									A--GTGTCCACGCACAAACTAACTACCTAAATTCTCTGCCGTGCCCAACAGAACAATACCCACAATACCTATCTATGTATTATTGTACATCTACTTATTTACCACTAGCATATGACCAGTAATGTTAACAGTTGATTTGGCCCTAAACATGAAAATT-ATTAAATTTGCATAAA-TGTTTTAATAACATGAATATTAAGCAGAGAATTAAAAGTGAAATGATATAGGACATAAAATTAAACCATTATACTCAACCATGAATATTGTTACGGTAATTGGTTATTTCTTAAATAACTATTCACGAGAAATAAGCAACCCTTGTTGGTAAGATACAACATTACCAGTTTCAGGCCCATTTAGTTTATAGCGTACATAATTTGATCTATTCTGGCCTCTGGTT…
CM-P82.1																													5	3						A--GTGTCCACGCACAAACTAACTACCTAAATTCTCTGCCGTGCCCAACAGAACAATACCCACAATACCTATCTATGTATTATTGTACATCTACTTATTTACCACTAGCATATGACCAGTAATGTTAACAGTTGATTTGGCCCTAAACATAAAAATT-ATTAAATTTGCATAAAATATTTTAATAACATGAATATTAAGCAGAGAGTTAAAAGTGAAATGATATAGGACATAAAATTAAACCATTATACTCAACCATGAATATTGTCACAGTAATTGGTTATTTCTTAAATAGCTATTCACGAGAAATAAGCAACCCTTGTTAGTAAGATACAACATTACCAGTTTCAAGCCCATTCAGTTTGTGGCGTACATAACTTGATCTATTCTGGCCTCTGGTT…
CM-P83.1													1																							A--GTGTCCACGCACAAACTAACTACCTAAATTCTCTGCCGTGCCCAACAGAACAATACCCACAATACCTATCTATGTATTATTGTACATCTACTTATTTACCACTAGCATATGACCAGTAATGTTAACAGTTGATTTGGCCCTAAACATGAAAATT-ATTGAATCCACATAAA-TATTTTAATAACATGAATATTAAGCAGAGAATTAAAAGTGAAATGATATAGGACATAAAATTAAACCATTATACTCAACCATGAATATCGTCACGGTAATTGGTTATTTCTTAAGTAGCTATTCACGAGAAATAAGCAACCCTTGTTAGTAAGATACAACATTACCAGTTTCAGGCCCATTTAGTTTATAGCGTACATAACCTGATCTATTCTGGCCTCTGGTT…
CM-P84.1											4																									A--GTGTCCACGCACAAACTAACTACCTAAATTCTCTGCCGTGCCCAACAGAACAATACCCACAATACCTATCTATGTATTATTGTACATCTACTTATCTACCACTAGCATATGACCAGTAATGTTAACAGTTGATTTGGCCCTAAACATAAAAATT-ATTGAATTCACATAAA-TATTTTAATGGCATGAATATTAAGCAGAGAATTAAAAGTGAAATGATATAGGACATAAAATTAAACCATTATACTCAACCATGAATATTGTCACAGTAATTGGTTATTTCTTAAATAGCTATTCACGAGAAATAAGCAATCCTTGTTAGTAAGATACAACATTACCAGTTTCAGGCCCATTCAGTTTGTGGCGTACATAATTTGATCTATTCTGGCCTCTGGTT…
CM-P85.1														10				1																		A--GTGTCCACGCACAAACTAATTACCTAAATTCTCTGCCGTGCCCAACAGAACAATACCCACAATACCTATCTATGTATTATTGTACATCTACTTATCTACCACTAGCATATGACCAGTAATGTTAACAGTTGATTTGGCCCTAAACATAAAAATT-ATTGAATTCACATAAA-TATTTTAATGGCATGAATATTAAGCAGAGAATTAAAAGTGAAATGATATAGGACATAAAATTAAACCATTATACTCAACCATGAATATTGTCACAGTAATTGGTTATTTCTTAAATAGCTATTCACGAGAAATAAGCAACCCTTGTTAGTAAGATACAACATTACCAGTTTCAGGCCCATTCAGTTTGTGGCGTACATAATTTGATCTATTCTGGCCTCTGGTT…
CM-P87.1																													87	6						A--GTGTCCACGCACAAACTAACTACCTAAATTCTCTGCCGTGCCCAACAGAACAATACCCACAATACCTATCTATGTATTATTGTACATCTACTTATTTACCACTAGCATATGACCAGTAATGTTAACAGTTGATTTGGCCCTAAACATGAAAATT-ATTGAATCCACATAAA-TATTTTAACAACATGAATATTAAGCAGAGAATTAAAAGTGAAATGATATAGGACATAAAATTAAACCATTATACTCAACCATGAATATCGTCACAGTAATTGGTTATTTCTTAAGTAGCTATTCACGAGAAATAAGCAACCCTTGTTAGTAAGATACAACATTACCAGTTTCAGGCCCATTTAGTTTATAGCGTACATAACCTGATCTATTCTGGCCTCTGGTT…
CM-P88.1																			1																	A--GTGTCCACGCACAAACTAACTACCTAAATTCTCTGCCGTGCCCAACAGAACAATACCCACAATACCTATCTATGTATTATTGTACATCTACTTATTTACCACTAGCATATGACCAGTAATGTTAACAGTTGATTTGGCCCTAAACATGAAAATT-ATTGAATCCACATAAA-TATTTTAATAACATGAATATTAAGCAGAGAATTAAAAGTGAAATGATATAGGACATAAAATTAAACCATTATACTCAACCATGAATATCGTCACAGTAATTGGTTATTTCTTAAGTAGCTATTCACGAGAAATAAGCAACCCTTGTTAGTAAGATACAACATTACCAGTTTCAGGCCCATTTAGTTTATAGCGTACATAACCTGATCTATTCTGGCCTCTGGTT…
CM-P91.1																	1											27		2						A--GTGTCCACGCACAAACTAACTACCTAAATTCTCTGCCGTGCCCAACAGAACAATACCCACAATACCTATCTATGTATTATTGTACATCTACTTATTTACCACTAGCATATGACCAGTAATGTTAACAGTTGATTTGGCCCTAAACATGAAAATT-ATTGAATCCACATAAA-TATTTTAATAACATGAATATTAAGCAGAGAATTAAAAGTGAAATGATATAGGACATAAAATTAAACCATTATACTCAACCATGAATATCGTCACAGTAATTGGTTATTTCTTAAGTAGCTATTCACGAGAAATAAGCAACCCTTGTTAGTAAGATACAACATTACCAGTTTCAAGCCCATTTAGTTTATAGCGTACATAACCTGATCTATTCTGGCCTCTGGTT…
CM-P93.1																											2									A--GTGTCCACGCACAAACTAACTACCTAAATTCTCTGCCGTGCCCAACAGAACAATACCCACAATACCTATCTATGTATTATTGTACATCTACTTATTTACCACTAGCATATGACCAGTAATGTTAACAGTTGATTTGGCCCTAAACATGAAAATT-ATTGAATCCACATAAA-TATTTTGATAACATGAATATTAAGCAGAGAATTAAAAGTGAAATGATATAGGACATAAAATTAAACCATTATACTCAACCATGAATATCGTCACAGTAATTGGTTATTTCTTAAGTAGCTATTCACGAGAAATAAGCAACCCTTGTTAGTAAGATACAACATTACCAGTTTCAGGCCCATTTAGTTTATAGCGTACATAACCTGATCTATTCTGGCCTCTGGTT…
CM-P95.1																																		1		A--GTGTCCACGCACAAACTAACTACCTAAATTCTCTGCCGTGCCCAACAGAACAATACCCACAATACCTATCTATGTATTATTGTACATCTACTTATTTACCACTAGCATATGACCAGTAATGTTAACAGTTGATTTGGCCCTAAACATAAAAATT-ATTAAATTTGCATAAAATATTTTAGTAACATGAATATTAAGCAGAGAGTTAAAAGTGAAATGATATAGGACATAAAATTAAACCATTATACTCAACCATGAATATTGTCACAGTAATTGGTTATTTCTTAAATAGCTATTCACGAGAAATAAGCAACCCTTGTTAGTAAGATACAACATTACCAGTTTCAGGCCCATTCAGTTTGTGGCGTACATAACTTGATCTATTCTGGCCTCTGGTT…
CM-P97.1																						2														A--GTGTCCACGCACAAACTA----CCTAAATTCTCTGCCGTGCCCAACAGAACAATACCCACAATACCTATCTATGTATTATTGTACATCTACTTATTTACCACTAGCATATGACCAGTAATGTTAACAGTTGATTTGGCCCTAAACATGAAAATT-ATTGAGTTTACATAAA-CATTTTAATAACATGGATATTAAGCAGAGGATTAAAAGTGAAATGATATAGGACATAAAATTAAACCATTATACTCAACCATGAATATTGTCACAGTAATTGGTTATTTCTTAAATAGCTATTCACGAGAAATAAGCAACCCTTGTTAGTAAGATACAACATTACCAGTTTCAAGCCCATTCAGTTTGTGGCGTACATAATTTGATCTATTCTGGCCTCTGGTT…
CM-P98.1											8																									A--GTGTCCACGCACAAACTAACTACCTAAATTCTCTGCCGTGCCCAACAGAACAATACCCACAATACCTATCTATGTATTATTGTACATCTACTTATTTACCACTAGCATATGACCAGTAATGTTAACAGTTGATTTGGCCCTAAACATGAAAATT-ATTAAATTTGCATAAA-TGTTTTAATAACATGAATATTAAGCAGAGAATTAAAAGTGAAATGATATAGGACATAAAATTAAACCATTATACTCAACCATGAATATTGTTACGGTAATTGGTTATTTCTTAAATAACTATTCACGAGAAATAAGCAACCCTTGTTGGTAAGATACAACATTACCAGTTTCAAGCCCATTTAGTTTATAGCGTACATAATTTGATCTATTCTGGCCTCTGGTT…
CM-P103.1																														7						A--GTGTCCACGCACAAACTAACTACCTAAATTCTCTGCCGTGCCCAACAGAACAATACCCACAATACCTATCTATGTATTATTGTACATCTACTTATTTACCACTAGCATATGACCAGTAATGTTAACAGTTGATTTGGCCCTAAACATGAAAATT-ATTGAATCCACATAAA-TATTTTAATAACATGAATATTAAGCAGAGAATTAAAAGTGAAATGATATAGGACATAAAATTAAACCATTATACTCAACCATGGATATCGTCACAGTAATTGGTTATTTCTTAAGTAGCTATTCACGAGAAATAAGCAACCCTTGTTAGTAAGATACAACATTACCAGTTTCAGGCCCATTTAGTTTATAGCGTACATAACCTGATCTATTCTGGCCTCTGGTT…
CM-P104.1																													2	10						A--GTGTCCACGCACAAACTAACTACCTAAATTCTCTGCCGTGCCCAACAGAACAATACCCACAATACCTATCTATGTATTATTGTACATCTACTTATTTACCACTAGCATATGACCAGTAATGTTAACAGTTGATTTGGCCCTAAACATGAAAATT-ATTGAATCCACATAAA-TATTTTAATAACATGAATATTAAGCAGAGAATTAAAAGTGAAATGATATAGGACATAAAATTAAACCATTATACTCAACCATGAATATCGTCACAGTAATTGGTTATTTCTTAAGTAGCTATTCACGAGAAATAAGCAACCCTTGTTAGTAAGATACAACATTACCAGTTTCAGGCCCATTTAGTTTATAGCGTACATAACCTGATCTATTCTGGCCTCTGGTT…
CM-P108.1											2																									A--GTGTCCACGCACAAACTAACTACCTAAATTCTCTGCCGTGCCCAACAGAACAATACCCACAATACCTATCTATGTATTATTGTACATCTACTTATTTACCACTAGCATATGACCAGTAATGTTAACAGTTGATTTGGCCCTAAACATGAAAATT-ATTAAATTTGCATAAA-TGTTTTAATAACATGAATATTAAGCAGAGAATTAAAAGTGAAATGATATAGGACATAAAATTAAACCATTATACTCAACCATGAATATTGTTACGGTAATTGGTTATTTCTTAAATAACTATTCACGAGAAATAAGCAACCCTTGTTGGTAAGATACAACATTACCAGTTTCAAGCCCATTTAGTTTATAGCGTACATAACTTGATCTATTCTGGCCTCTGGTT…
CM-P117.1														1																						A--GTGTCCACGCACAAACTA----CCTAAATTCTCTGCCGTGCCCAACAGAACAATACCCACAATACCTATCTATGTATTATTGTACATCTACTTATTTACCACTAGCATATGACCAGTAATGTTAACAGTTGATTTGGCCCTAAACATGAAAATT-ATTGAATTTGCATAAA-CATTTTAATAACATGAATATTAAGCAGAGAATTAAAAGTGAAATGATATAGGACATAAAATTAAACCATTATACTCAACCATGAATATTGTCACAGTAATTGGTTATTTCTTAAATAGCTATTCACGAGAAATAAGCAACCCTTGTTAGTAAGATACAACATTACCAGTTTCAAGCCCATTCAATTTGTGGCGTACATAATCTGATCTATTCTGGCCTCTGGTT…
CM-P121.1																																	1		3	A--GTGTCCACGCACAAACTAACTACCTAAATTCTCTGCCGTGCCCAACAGAACAATACCCACAATACCTATCTATGTATTATTGTACATCTACTTATTTACCACTAGCATATGACCAGTAATGTTAACAGTTGATTTGGCCCTAAACATAAAAATT-ATTAAATTTGCATAAAATATTTTAATAACATGAATATTAAGCAGAGAGTTAAAAGTGAAATGATATAGGACATAAAATTAAACCATTATACTCAACCATGAATATTGTCACAGTAATTGGTTATTTCTTAAATAGCTATTCACGAGAAATAAGCAACCCTTGTTAGTAAGATACAACATTACCAGTTTCAGGCCCATTCAGTTTGTGGCGTACATAACTTGATCTATTCTGGCCTCTGGTT…
CM-P121.2																																	1			A--GTGTCCACGCACAAACTAACTACCTAAATTCTCTGCCGTGCCCAACAGAACAATACCCACAATACCTATCTATGTATTATTGTACATCTACTTATTTACCACTAGCATATGACCAGTAATGTTAACAGTTGATTTGGCCCTAAACATAAAAATT-ATTAAATTTGCATAAAATATTTTAATAACATGAATATTAAGCAGAGAGTTAAAAGTGAAATGATATAGGACATAAAATTAAACCATTATACTCAACCATGAATATTGTCACAGTAATTGGTTATTTCTTAAATAGCTATTCACGAGAAATAAGCAACCCTTGTTAGTAAGATACAACATTACCAGTTTCAGGCCCATTCAGTTTGTGGCGTACATAACTTGATCTATTCTGGCCTCTGGTT…
CM-P122.1																																				AAAGTGTCCACGCACAAAC----TACCTAAATTCTCTGCCGTGCCCAACAGAACAATACCCACAATACCTATCTATGTATTATTGTACATCTACTTATTTACCACTAGCATATGACCAGTAATGTTAACAGTTGATTTGGCCCTAAACATGAAAATT-ATTGAGTTTGCATA-AACATTTTAATAACATGAATATTAAGCAGAGAATTAAAAGTGAAATGATATAGGACATAAAATTAAACCATTATACTCAACCATGAATATTGTCACAGTAATTGGTTATTTCTTAAATAGCTATTCACGAGAAATAAGCAACCCTTGTTAGTAAGATACAACATTACCAGTTTCAAGCCCATTCGATTTGTGGCGTACATAATTTGATCTATTCTGGCCTCTGGTT…
CM-P123.1																	2																			A--GTGTCCACGCACAAACTA----CCTAAATTCTCTGCCGTGCCCAACAGAACAATACCCACAATACCTATCTATGTATTATTGTACATCTACTTATTTACCACTAGCATATGACCAGTAATGTTAACAGTTGATTTGGCCCTAAACATGAAAATT-ATTGAGTTTGCATAAA-CATTTTAATAACATGAATATTAAGCAGAGAATTAAAAGTGAAATGATATAGGACATAAAATTAAACCATTATACTCAACCATGAATATTGTCACAGTAATTGGTTATTTCTTAAATAGCTATTCACGAGAAATAAGCAACCCTTGTTAGTAAGATACAACATTACCAGTTTCAAGCCCATTCAATTTGTGGCGTACATAACTTGATCTATTCTGGCCTCTGGTT…
CM-P126.1																																	1	1		A--GTGTCCACGCACAAACTAACTACCTAAATTCTCTGCCGTGCCCAACAGAACAATACCCACAATACCTATCTATGTATTATTGTACATCTACTTATTTACCACTAGCATATGACCAGTAATGTTAACAGTTGATTTGGCCCTAAACATAAAAATT-ATTAAATTTGCATAAAATATTTTAATAACATGAATATTAAGCAGAGAGTTAAAAGTGAAATGATATAGGACATAAAATTAAACCATTATACTCAACCATGAATATTGTCACAGTAATTGGTTATTTCTTAAATAGCTATTCACGAGAAATAAGCAACCCTTGTTAGTAAGATACAACATTACCAGTTTCAGGCCCATTCAGTTTGTGGCGTACATAACTTGATCTATTCTGGCCTCTGGTT…
CM-P127.1																																		3	2	A--GTGTCCACGCACAAACTAACTACCTAAATTCTCTGCCGTGCCCAACAGAACAATACCCACAATACCTATCTATGTATTATTGTACATCTACTTATTTACCACTAGCATATGACCAGTAATGTTAACAGTTGATTTGGCCCTAAACATAAAAATT-ATTAAATTTGCATAAAATATTTTAATAACATGAATATTAAGCAGAGAATTAAAAGTGAAATGATATAGGACATAAAATTAAACCATTATACTCAACCATGAATATTGTCACAGTAATTGGTTATTTCTTAAATAGCTATTCACGAGAAATAAGCAACCCTTGTTAGTAAGATACAACATTACCAGTTTCAGGCCCATTCAGTTTGTGGCGTACATAACTTGATCTATTCTGGCCTCTGGTT…
CM-P128.1																																		1	3	A--GTGTCCACGCACAAACTAACTACCTAAATTCTCTGCCGTGCCCAACAGAACAATACCCACAATACCTATCTATGTATTATTGTACATCTACTTATTTACCACTAGCATATGACCAGTAATGTTAACAGTTGATTTGGCCCTAAACATAAAAATT-ATTAAATTTGCATAAAATATTTTAATAACATGAATATTAAGCAGAGAGTTAAAAGTGAAATGATATGGGACATAAAATTAAACCATTATACTCAACCATGAATATTGTCACAGTAATTGGTTATTTCTTAAATAGCTATTCACGAGAAATAAGCAACCCTTGTTAGTAAGATACAACATTACCAGTTTCAGGCCCATTCAGTTTGTGGCGTACATAACTTGATCTATTCTGGCCTCTGGTT…
CM-P130.1																																				AAAGTGTCCACGCACAAACTAACTACCTAAATTCTCTGCCGTGCCCAACAGAACAATACCCACAATACCTATCTATGTATTATTGTACATCTACTTATTTACCACTAGCATATGACCAGTAATGTTAACAGTTGATTTGGCCCTAAACATGAAAATT-ATTGAATCCACATA-AATATTTTAATAACATGAATATTAAGCAGAGAATTAAAAGTGAAATGATATAGGACATAAAATTAAACCATTATACTCAACCATGAATATCGTCACAGTAATTGGTTATTTCTTAAGTAGCTATTCACGAGAAATAAGCAACCCTTGTTAGTAAGATACAACATTACCAGTTTCAGGCCCATTTAGTTTATAACGTACATAACCTGATCTATTCTGGCCTCTGGTT…
CM-P131.1																																				AAAGTGTCCACGCACAAACTAACTACCTAAATTCTCTGCCGTGCCCAACAGAACAATACCCACAATACCTATCTATGTATTATTGTACATCTACTTATTTACCACTAGCATATGACCAGTAATGTTAACAGTTGATTTGGCCCTAAACATGAAAATT-ATTAAATTTGCATAAAATATTTTAATAACATGAATATTAAGCAGAGAGTTAAAAGTGAAATGATATAGGACATAAAATTAAACCATTATACTCAACCATGAATATTGTCACAGTAATTGGTTATTTCTTAAATAGCTATTCACGAGAAATAAGCAACCCTTGTTAGTAAGATACAACATTACCAGTTTCAGGCCCATTCAGTTTGTGGCGTACATAACTTGATCTATTCTGGCCTCTGGTT…
CM-P133.1																													1							A--GTGTCCACGCACAAACTAACTACCTAAATTCTCTGCCGTGCCCAACAGAACAATACCCACAATACCTATCTATGTATTATTGTACATCTACTTATTTACCACTAGCATATGACCAGTAATGTTAACAGTTGATTTGGCCCTAAACATGAAAATT-ATTGGATCCACATAAA-TATTTTAACAACATGAATATTAAGCAGAGAATTAAAAGTGAAATGATATAGGACATAAAATTAAACCATTATACTCAACCATGAATATCGTCACAGTAATTGGTTATTTCTTAAGTAGCTATTCACGAGAAATAAGCAACCCTTGTTAGTAAGATACAACATTACCAGTTTCAGGCCCATTTAGTTTATAGCGTACATAACCTGATCTATTCTGGCCTCTGGTT…
CM-P134.1											1																									A--GTGTCCACGCACAAACTAACTACCTAAATTCTCTGCCGTGCCCAACAGAACAATACCCACAATACCTATCTATGTATTATTGTACATCTACTTATTTACCACTAGCATATGACCAGTAATGTTAACAGTTGATTTGGCCCTAAACATGAAAATT-ATTAAATTTGCATAAA-TGTTTTAATAACATGAATATTAAGCAGAGAATTAAAAGTGAAATGATATAGGACATAAAATTAAACCATTATACTCAACCATGAATATTGTTACGGTAATTGGTTATTTCTTAAATAACTATTCACGAGAAATAAGCAACCCTTGTTGGTAAGATACAACATTACCAGTTTCAGGCCCATTTAGTCTATAGCGTACATAATTTGATCTATTCTGGCCTCTGGTT…
CM-P154.1																															4					A--GTGTCCACGCACAAACTAACTACCTAAATTCTCTGCCGTGCCCAACAGAACAATACCCACAATACCTATCTATGTATTATTGTACATCTACTTATTTACCACTAGCATATGACCAGTAATGTTAACAGTTGATTTGGCCCTAAACATGAAAATT-ATTGAATCCACATAAA-TATTTTAATAACATGAATATTAAGCAGAGAATTAAAAGTGAAATGATATAGGACATAAAATTAAACCATTATACTCAACCATGAATATCGTCACAGTAATTGGTCATTTCTTAAATAGCTATTCACGAGAAATAAGCAACCCTTGTTAGTAAGATACAACATTACCAGTTTCAGGCCCATTTAGTTTATAGCGTACATAACCTGATCTATTCTGGCCTCTGGTT…
CM-P160.1														1																						A--GTGTCCACGCACAAACTAACTACCTAAATTCTCTGCCGTGCCCAACAGAACAATACCCACAATACCTATCTATGTATTATTGTACATCTACTTATTTACCACTAGCATATGACCAGTAATGTTAACAGTTGATTTGGCCCTAAACATGAAAATT-ATTAAATTTGCATAAA-TGTTTTAATAACATGAATATTAAGCAGAGAATTAAAAGTGAAATGATATAGGACATAAAATTAAACCATTATACTCAACCATGAATATTGTTACGGTAATTGGTTATTTCTTAAATAACTATTCACGAGAAATAAGCAACCCTTGTTGGTAAGATACAACATTACCAGTTTCAAGCCCATTTAGTTTATAGCGTACATAACTTGATCTATTCTGGCCTCTGGTT…
CM-P168.1													1																							A--GTGTCCACGCACAAACTAACTACCTAAATTCTCTGCCGTGCCCAACAGAACAATACCCACAATACCTATCTATGTATTATTGTACATCTACTTATTTACCACTAGCATATGACCAGTAATGTTAACAGTTGATTTGGCCCTAAACATGAAAATT-ATTAAATTTGCATAAA-TGTTTTAATAACATGAATATTAAGCAGAGAATTAAAAGTGAAATGATATAGGACATAAAATTAAACCATTATACTCAACCATGAATATTGTCACGGTAATTGGTTATTTCTTAAATAGCTATTCACGAGAAATAAGCAACCCTTGTTGGTAAGATACAACATTACCAGTTTCAAGCCCATTTAGTTTATAGCGTACATAATTTGATCTATTCTGGCCTCTGGTT…
CM-P169.1											1																									A--GTGTCCACGCACAAACTAACTACCTAAATTCTCTGCCGTGCCCAACAGAACAATACCCACAATACCTATCTATGTATTATTGTACATCTACTTATTTACCACTAGCATATGACCAGTAATGTTAACAGTTGATTTGGCCCTAAACATGAAAATT-ATTAAATTTGCATAAA-TGTTTTAATAACATGAATATTAAGCAGAGAATTAAAAGTGAAATGATATAGGACATAAAATTAAACCATTATACTCAACCATGAATATTGTTACGGTAATTGGTTATTTCTTAAATAACTATTCACGAGAAATAAGCAACCCTTGTTAGTAAGATACAACATTACCAGTTTCAAGCCCATTTAGTTTATAGCGTACATAATTTGATCTATTCTGGCCTCTGGTT…
CM-P170.1											2																									A--GTGTCCACGCACAAACTAACTACCTAAATTCTCTGCCGTGCCCAACAGAACAATACCCACAATACCTATCTATGTATTATTGTACATCTACTTATTTACCACTAGCATATGACCAGTAATGTTAACAGTTGATTTGGCCCTAAACATGAAAATT-ATTAAATTTGCATAAA-TGTTTTAATAACATGAATATTAAGCAGAGAATTAAAAGTGAAATGATATAGGACATAAAATTAAACCATTATACTCAACCATGAATATTGTTACGGTAATTGGTTATTTCTTAAATAACTATTCACGAGAAATAAGCAACCCTTGTTGGTAAGATACAACATTACCAGTTTCAAGCCCATTTAGTTTATAACGTACATAATTTGATCTATTCTGGCCTCTGGTT…
CM-P171.1											1																									A--GTGTCCACGCACAAACTA----CCTAAATTCTCTGCCGTGCCCAACAGAACAATACCCACAATACCTATCTATGTATTATTGTACATCTACTTATTTACCACTAGCATATGACCAGTAATGTTAACAGTTGATTTGGCCCTAAACATGAAAATT-ATTGAGTTTGCATAAA-CATTTTAATAACATGAATATTAAGCAGAGAATTAAAAGTGAAATGATATAGGACATAAAATTAAACCATTATACTCAACCATGGATATTGTCACAGTAATTGGTTATTTCTTAAATAGCTATTCACGAGAAATAAGCAACCCTTGTTAGTAAGATACAACATTACCAGTTTCAAGCCCATTCAATTTGTGGCGTACATAATTTGATCTATTCTGGCCTCTGGTT…
CM-P173.1														2																						A--GTGTCCACGCACAAACTAATTACCTAAATTCTCTGCCGTGCCCAACAGAACAATACCCACAATACCTATCTATGTATTATTGTACATCTACTTATCTACCACTAGCATATGACCAGTAATGTTAACAGTTGATTTGGCCCTAAACATAAAAATT-ATTGAATTCACATAAA-TATTTTAATGACATGAATATTAAGCAGAGAATTAAAAGTGAAATGATATAGGACATAAAATTAAACCATTATACTCAACCATGAATATTGTCACAGTAATTGGTTATTTCTTAAATAGCTATTCACGAGAAATAAGCAACCCTTGTTAGTAAGATACAACATTACCAGTTTCAGGCCCATTCAGTTTGTGGCGTACATAATTTGATCTATTCTGGCCTCTGGTT…
CM-P192.1																						1														A--GTGTCCACGCACAAACTA----CCTAAATTCTCTGCCGTGCCCAACAGAACAATACCCACAATACCTATCTATGTATTATTGTACATCTACTTATTTACCACTAGCATATGACCAGTAATGTTAACAGTTGATTTGGCCCTAAACATGAAAATT-ATTGAATTTGCATAAA-CATTTTAATAACATGAATATTAAGCAGAGAATTAAAAGTGAAATGATATAGGACATAAAATTAAACCATTATACTCAACCATGAATATTGTCACAGTAATTGGTTATTTCTTAAATAGCTATTCACGAGAAATAAGCAACCCTTGTTAGTAAGATACAACATTACCAGTTTCAAGCCCATTCAATTTGTAGCGTACATAATCTGATCTATTCTGGCCTCTGGTT…
CM-P208.1																																		2		A--GTGTCCACGCACAAACTAACTACCTAAATTCTCTGCCGTGCCCAACAGAACAATACCCACAATACCTATCTATGTATTATTGTACATCTACTTATTTACCACTAGCATATGACCAGTAATGTTAACAGTTGATTTGGCCCTAAACATAAAAATT-ATTAAATTTGCATAAAATATTTTAATAACATGAATATTAAGCAGAGAGTTAAAAGTGAAATGATATAGGACATAAAATTAAACCATTATACTCAACCATGAATATTGTCACAGTAATTGGTTATTTCTTAAATAGCTATTCACGAGAAATAAGCAACCCTTGTTAGTAAGATACAACATTACCAGTTTCAGGCCCATTCAGTTTGTGGCGTACATAACTTGATCTATTCTGGCCTCTGGTT…
CM-P210.1																																				AAAGTGTCCACGCACAAACTAACTACCTAAATTCTCTGCCGTGCCCAACAGAACAATACCCACAATACCTATCTATGTATTATTGTACATCTACTTATTTACCACTAGCATATGACCAGTAATGTTAACAGTTGATTTGGCCCTAAACATGAAAATT-ATTGAATCCACATA-AATATTTTAATAACATGAATGTTAAGCAGAGAATTAAAAGTGAAATGATATAGGACATAGAATTAAACCATTATACTCAACCATGAATATCGTCACAGTAATTGGTTATTTCTTAAGTAGCTATTCACGAGAAATAAGCAACCCTTGTTAGTAAGATACAACATTACCAGTTTCAGGCCCATTTAGTTTATAGCGTACATAACCTGATCTATTCTGGCCTCTGGTT…
CM-P213.1																																				AAAGTGTCCACGCACAAACTAATTACCTAAATTCTCTGCCGTGCCCAACAGAACAATACCCACAATACCTATCTATGTATTATTGTACATCTACTTATTTACCACTAGCATATGACCAGTAATGTTAACAGTTGATTTGGCCCTAAACATGAAAATT-ATTAAATTTGCATAAAATATTTTAATAACATGAATATTAAGCAGAGAATTAAAAGTGAAATGATATAGGACATAAAATTAAACCATTATACTCAACCATGAATATTGTCACAGTAATTGGTTATTTCTTAAATAGCTATTCACGAGAAATAAGCAACCCTTGTTAGTAAGATACAACATTACCAGTTTCAGGCCCATTCAGTTTGTGGCGTACATAACTTGATCTATTCTGGCCTCTGGTT…
CM-P247.1																																		1		A--GTGTCCACGCACAAACTAACTACCTAAATTCTCTGCCGTGCCCAATAGAACAATACCCACAATACCTATCTATGTATTATTGTACATCTACTTATTTACCACTAGCATATGACCAGTAATGTTAACAGTTGATTTGGCCCTAAACATGAAAATT-ATTGAATCCACATAAA-TATTTTGACAACATGAATATTAAGCAGAGAATTAAAAGTGAAATGATATAGGACATAAAATTAAACCATTATACTCAACCATGAATATCGTCACAGTAATTGGTTATTTCTTAAGTAGCTATTCACGAGAAATAAGCAACCCTTGTTAGTAAGATACAACATTACCAGTTTCAGGCCCATTTAGTTTATAGCGTACATAATTTGATCTATTCTGGCCTCTGGTT…
CM-P248.1																																		1		A--GTGTCCACGCACAAACTAACTACCTAAATTCTCTGCCGTGCCCAACAGAACAATACCCACAATACCTATCTATGTATTATTGTACATCTACTTATTTACCACTAGCATATGACCAGTAATGTTAACAGTTGATTTGGCCCTAAACATGAAAATT-ATTGAATCCACATAAA-TATTTTAATAACATGAATATTAAGCAGAGAATTAAAAGTGAAATGATATAGGACATAGAATTAAACCATTATACTCAACCATGAATATCGTCACAGTAATTGGTTATTTCTTAAGTAGCTATTCACGAGAAATAAGCAACCCTTGTTAGTAAGATACAACATTACCAGTTTCAGGCCCATTTAGTTTATAGCGTACATAACCTGATCTATTCTGGCCTCTGGTT…
CM-P250.1																															1					A--GTGTCCACGCACAAACTAACTACCTAAATTCTCTGCCGTGCCCAACAGAACAATACCCACAATACCTATCTATGTATTATTGTACATCTACTTATTTACCACTAGCATATGACCAGTAATGTTAACAGTTGATTTGGCCCTAAACATGAAAATT-ATTGAATCCACATAAA-TATTTTAATAACATGAATATTAAGCAGAGAATTAAAAGTGAAATGATATAGGACATAAAATTAAACCATTATACTCAACCATGAATATCGTCACAGTAATTGGTTATTTCTTAAATAGCTATTCACGAGAAATAAGCAACCCTTGTTAATAAGATACAACATTACCAGTTTCAGGCCCATTTAGTTTATAGCGTACATAACCTGATCTATTCTGGCCTCTGGTT…
CM-P251.1																															1					A--GTGTCCACGCACAAACTAACTACCTAAATTCTCTGCCGTGCCCAACAGAACAATACCCACAATACCTATCTATGTATTATTGTACATCTACTTATTTACCACTAGCATATGACCAGTAATGTTAACAGTTGATTTGGCCCTAAACATGAAAATT-ATTGGATCCACATAAA-TATTTTAATAACATGAATATTAAGCAGAGAATTAAAAGTGAAATGATATAGGACATAAAATTAAACCATTATACTCAACCATGAATATCGTCACAGTAATTGGTTATTTCTTAAGTAGCTATTCACGAGAAATAAGCAACCCTTGTTAGTAAGATACAACATTACCAGTTTCAAGCCCATTTAGTTTATAGCGTACATAACCTGATCTATTCTGGCCTCTGGTT…
Total	485	57	39	418	49	67	58	53	99	171	81	102	48	29	6	47	538	36	18	128	17	226	202	77	120	20	126	28	122	56	68	13	70	53	40
Reference	Barbanti A, Martin C, Blumenthal JM, Boyle J, Broderick AC, Collyer L, Ebanks-Petrie G, Godley BJ, Mustin W, Ordóñez V, Pascual M, Carreras C. 2019. How many came home? Evaluating ex situ conservation of green turtles in the Cayman Islands. Molecular ecology 28: 1637-1651 DOI: 10.1111/mec.15017.
	Dolfo V, Gaspar C, Bourjea J, Tatarata M, Planes S, Boissin E. 2023. Population genetic structure and mixed stock analysis of the green sea turtle, Chelonia mydas, reveal reproductive isolation in French Polynesia. Frontiers in Marine Science 10: 1201384 DOI: 10.3389/fmars.2023.1201384.
	Dutton PH, Jensen MP, Frutchey K, Frey A, LaCasella E, Balazs GH, Cruce J, Tagarino A, Farman R, Tatarata M. 2014a. Genetic stock structure of green turtle (Chelonia mydas) nesting populations across the Pacific islands. Pacific Science 68: 451-464 DOI: 10.2984/68.4.1.
	Dutton PH, Jensen MP, Frey A, LaCasella E, Balazs GH, Zárate P, Chassin-Noria O, Sarti-Martinez AL, Velez E. 2014b. Population structure and phylogeography reveal pathways of colonization by a migratory marine reptile (Chelonia mydas) in the central and eastern Pacific. Ecology and Evolution 4: 4209-4428 DOI: 10.1002/ece3.1269.
	Hamabata T, Kamezaki N, Hikida T. 2014. Genetic structure of green turtle (Chelonia mydas) peripheral populations nesting in the northwestern Pacific rookeries: evidence for northern refugia and postglacial colonization. Marine Biology 161: 495-507 DOI: 10.1007/s00227-013-2352-z.
	Hamabata T, Hikida T, Okamoto K, Watanabe S, Kamezaki N. 2015. Ontogenetic habitat shifts of green turtles (Chelonia mydas) suggested by the size modality in foraging aggregations along the coasts of the western Japanese main islands. Journal of Experimental Marine Biology and Ecology 463: 181-188 DOI: 10.1016/j.jembe.2014.12.007.
	Hamabata T, Matsuo A, Sato MP, Kondo S, Kameda K, Kawazu I, Fukuoka T, Sato K, Suyama Y, Kawata M. 2020. Natal origin identification of green turtles in the North Pacific by genome-wide population analysis with limited DNA samples. Frontiers in Marine Science 7:658 DOI: 10.3389/fmars.2020.00658.
	Jensen MP, Bell I, Limpus CJ, Hamann M, Ambar S, Whap T, David C, FitzSimmons NN. 2016. Spatial and temporal genetic variation among size classes of green turtles (Chelonia mydas) provides information on oceanic dispersal and population dynamics. Marine Ecology Progress Series 543: 241-256 DOI: 10.3354/meps11521.
	Joseph J, Nishizawa H. 2016a. Genetic structure and diversity of green turtles (Chelonia mydas) from two rookeries in the South China Sea. Journal of Sustainability Science and Management Special Issue 1: 41-47.
	Joseph J, Nishizawa H, Arshaad WM, Kadir SAS, Jaaman SA, Bali J, Jamaludin NA, Katoh M. 2016b. Genetic stock compositions and natal origin of green turtle (Chelonia mydas) foraging at Brunei Bay. Global Ecology and Conservation 6: 16-24 DOI: 10.1016/j.gecco.2016.01.003.
	Li M, Zhang T, Liu Y, Li Y, Fong JJ, Yu Y, Wang J, Shi HT, Lin L. 2023. Revisiting the genetic diversity and population structure of the endangered Green sea turtle (Chelonia mydas) breeding populations in the Xisha (Paracel) Islands, South China Sea. PeerJ 11: e15115 DOI: 10.7717/peerj.15115.
	Read TC, FitzSimmons NN, Wantiez L, Jensen MP, Keller F, Chateau O, Farman R, Werry J, MacKay KT, Petro G, Limpus CJ. 2015. Mixed stock analysis of a resident green turtle, Chelonia mydas, population in New Caledonia links rookeries in the South Pacific. Wildlife Research 42: 488-499 DOI: 10.1071/WR15064.
	Shamblin BM, Bjorndal KA, Bolten AB, Hillis‐Starr ZM, Lundgren I, NARO‐MACIEL E, Nairn CJ. 2012. Mitogenomic sequences better resolve stock structure of southern Greater Caribbean green turtle rookeries. Molecular Ecology 21: 2330-2340 DOI: 10.1111/j.1365-294X.2012.05530.x.
	Shamblin BM, Bagley DA, Ehrhart LM, Desjardin NA, Martin RE, Hart KM, Naro-Maciel E, Rusenko K, Stiner JC, Sobel D, Johnson C, Wilmers TJ, Wright LJ, Narin CJ. 2015a. Genetic structure of Florida green turtle rookeries as indicated by mitochondrial DNA control region sequences. Conservation Genetics 16: 673–685 DOI: 10.1007/s10592-014-0692-y.
	Shamblin BM, Dutton PH, Bjordal KA, Bolten AB, Naro-Maciel E, Santos AJB, Bellini C, Baptistotte C, Marcovaldi MÂ, Narin CJ. 2015b. Deeper mitochondrial sequencing reveals cryptic diversity and structure in Brazilian Green turtle rookeries. Chelonian Conservation and Biology 14: 167-172 DOI:10.2744/CCB-1152.1.
