# Supplementary material for: Identifying the source rookery of green turtles (Chelonia mydas) found in feeding grounds around the Korean Peninsula
Source: PeerJ. 2024 Jun 20;12:e17560. doi: 10.7717/peerj.17560 (PMC11193967; doi:10.7717/peerj.17560)
Supplement: Supplemental Information 3 [file peerj-12-17560-s003.xlsx]

## Sheet: Table S3_MSA data
Table S3. Data on the haplotypes of the mitochondrial control region (CR, 754 bp) sequences and the number of turtles for each haplotype in the seven rookeries of green turtles (Chelonia mydas) included in the mixed stock analysis (MSA). CNMI, Commonwealth of the Northern Mariana Islands
Region	1) South Western Pacific					2) Central Western Pacific					3) Indo Pacific				Japan			Korea
Rookery	northern Great Barrier Reef	southern Great Barrier Reef	Coral Sea	New Caledonia	Vanuatu	CNMI/Guam	Micronesia	Palau	Papua New Guinea	Republic of the Marshall Islands	Aru	Sarawak	Peninsular Malaysia	4) Xisha Island in China	5) Yeayama Island	6) Central Ryuku Island	7) Ogasawara	Korea
population size	24300	6600	2800	5700	28	165	1300	47	800	300	1000	300	350	100	67	760	500
Abbreviation	SWP (39,428)					CWP (2,612)					IP (1,650)			XI	YI	CRI	OGA	KOR
CM-P18.1														2
CM-P19.1														55
CM-P20.1						458					1					1
CM-P20.2						8
CM-P20.3						10
CM-P20.4						16
CM-P22.1						23
CM-P31.1	2
CM-P32.1						96
CM-P39.1																19	32	18
CM-P44.1	50
CM-P44.2	2
CM-P44.4	1
CM-P44.5	1
CM-P47.1	133													1
CM-P47.2	5
CM-P47.3	1
CM-P49.1	1					2					54			2		4		3
CM-P50.1															6	34	5	6
CM-P53.1															2	6	2	2
CM-P54.1															4		2	1
CM-P54.2															1
CM-P57.1											1			1
CM-P61.1						77
CM-P65.1						1
CM-P67.1						2
CM-P68.1	3
CM-P70.1																3	1	1
CM-P75.1														1
CM-P77.1						69
CM-P79.1																	1	1
CM-P80.1	25
CM-P81.1	7
CM-P82.1											8
CM-P83.1	1
CM-P84.1	4
CM-P85.1	10
CM-P87.1											93
CM-P88.1						1
CM-P91.1						1					29
CM-P95.1																	1
CM-P98.1	8
CM-P103.1											7
CM-P104.1											12
CM-P108.1	2
CM-P117.1	1
CM-P121.1																1		3
CM-P121.2																1
CM-P123.1						2
CM-P126.1																1	1
CM-P127.1																	3	2
CM-P128.1																	1	3
CM-P133.1											1
CM-P134.1	1
CM-P154.1														4
CM-P160.1	1
CM-P168.1	1
CM-P169.1	1
CM-P170.1	2
CM-P171.1	1
CM-P173.1	2
CM-P208.1																	2
CM-P247.1																	1
CM-P248.1																	1
CM-P250.1														1
CM-P251.1														1
