# Supplementary material for: Identifying the source rookery of green turtles (Chelonia mydas) found in feeding grounds around the Korean Peninsula
Source: PeerJ. 2024 Jun 20;12:e17560. doi: 10.7717/peerj.17560 (PMC11193967; doi:10.7717/peerj.17560)
Supplement: Supplemental Information 4 — SWP, South Western Pacific; CWP, Central Western Pacific; IP, Indo Pacific; XI, Xisha Island; YI, Yaeyama Island; CRI, Central Ryuku Island; OGA, Ogasawara. [file peerj-12-17560-s004.xlsx]

## Sheet: Table S4_MSA Result
Table. S4. The contribution of seven source rookeries of green turtles (Chelonia mydas) on the stock of feeding grounds in the study area based on combined data, maturity, season, and specific feeding groups. SWP, South Western Pacific; CWP, Central Western Pacific; IP, Indo Pacific; XI, Xisha Island; YI, Yaeyama Island; CRI, Central Ryuku Island; OGA, Ogasawara.
754bp combined_no prior							754bp combined_rookery size prior
Category	Source rookery	Mean	SD	Q02.5	Q97.5		Category	Source rookery	Mean	SD	Q02.5	Q97.5
combined data	SWP	0.0260297	0.0249206	0.00078439	0.0894446		combined data	SWP	0.0243323	0.0254741	0.000599606	0.0918043
combined data	CWP	0.0235042	0.0230682	0.000680557	0.0863781		combined data	CWP	0.0261277	0.0262781	0.000728165	0.0909899
combined data	IP	0.0462202	0.0413822	0.00118913	0.151444		combined data	IP	0.0423182	0.0373849	0.00159238	0.136477
combined data	XI	0.0272813	0.0264722	0.000766456	0.100933		combined data	XI	0.025618	0.0233152	0.000953432	0.0868527
combined data	YI	0.0802962	0.0650161	0.00213983	0.246691		combined data	YI	0.0335246	0.0246125	0.00131734	0.0879238
combined data	CRI	0.37773	0.0983762	0.174801	0.570554		combined data	CRI	0.460592	0.0992521	0.254457	0.637469
combined data	OGA	0.418938	0.0884035	0.2562	0.602625		combined data	OGA	0.387488	0.0920352	0.224167	0.591712
754bp maturity_no prior							754bp maturity_rookery size prior
Category	Source rookery	Mean	SD	Q02.5	Q97.5		Category	Source rookery	Mean	SD	Q02.5	Q97.5
Juvenile	SWP	0.0660486	0.0607561	0.0021377	0.22191		Juvenile	SWP	0.0693509	0.0620103	0.00199848	0.222095
Juvenile	CWP	0.0681163	0.0619043	0.00160181	0.232016		Juvenile	CWP	0.0701946	0.0643014	0.00226224	0.247074
Juvenile	IP	0.0994724	0.0752397	0.00293687	0.280776		Juvenile	IP	0.0948762	0.0739466	0.00374752	0.27056
Juvenile	XI	0.0703265	0.062602	0.00202747	0.229907		Juvenile	XI	0.0424502	0.0345371	0.0015528	0.127323
Juvenile	YI	0.200525	0.112943	0.0129502	0.43292		Juvenile	YI	0.0395403	0.0345344	0.00113483	0.1246
Juvenile	CRI	0.197932	0.119323	0.0136971	0.460563		Juvenile	CRI	0.365362	0.134181	0.0828447	0.610129
Juvenile	OGA	0.297579	0.104042	0.13039	0.5398		Juvenile	OGA	0.318226	0.117885	0.128602	0.578149
Adult	SWP	0.0500165	0.046516	0.00120471	0.17052		Adult	SWP	0.0488969	0.0464593	0.00143169	0.172299
Adult	CWP	0.0532162	0.049882	0.00134527	0.192731		Adult	CWP	0.0505591	0.0466962	0.000951831	0.174471
Adult	IP	0.0691618	0.059211	0.00286102	0.215164		Adult	IP	0.0663628	0.0587396	0.00235241	0.210765
Adult	XI	0.0527967	0.0501609	0.000998767	0.184989		Adult	XI	0.0345448	0.0283483	0.000883002	0.108215
Adult	YI	0.0731494	0.0632734	0.00203228	0.241687		Adult	YI	0.0265779	0.0242564	0.000602736	0.0849821
Adult	CRI	0.362488	0.114917	0.146862	0.582267		Adult	CRI	0.445142	0.11945	0.193577	0.674645
Adult	OGA	0.339171	0.108043	0.153992	0.567384		Adult	OGA	0.327917	0.10994	0.13595	0.569351
754bp season_no prior							754bp season_rookery size prior
Category	Source rookery	Mean	SD	Q02.5	Q97.5		Category	Source rookery	Mean	SD	Q02.5	Q97.5
Summer	SWP	0.0427004	0.0413973	0.00139326	0.148942		Summer	SWP	0.0435079	0.0396389	0.00160953	0.147488
Summer	CWP	0.0454764	0.0424211	0.00155693	0.163636		Summer	CWP	0.0440243	0.0415694	0.00101171	0.147524
Summer	IP	0.0937915	0.0653231	0.00493155	0.249885		Summer	IP	0.0881336	0.0657585	0.00505642	0.252083
Summer	XI	0.0481313	0.0471052	0.000992444	0.173695		Summer	XI	0.032926	0.0286532	0.00079901	0.107674
Summer	YI	0.114787	0.0839265	0.00586337	0.313502		Summer	YI	0.0375361	0.0269859	0.0018559	0.100248
Summer	CRI	0.17477	0.0941473	0.0231672	0.37509		Summer	CRI	0.243586	0.106614	0.0540669	0.453838
Summer	OGA	0.480343	0.107808	0.276165	0.687741		Summer	OGA	0.510286	0.1069	0.30403	0.719876
Autumn	SWP	0.0755199	0.0648264	0.00155664	0.245762		Autumn	SWP	0.0758314	0.0725215	0.00189528	0.270769
Autumn	CWP	0.0671424	0.0614673	0.00130489	0.23685		Autumn	CWP	0.0710393	0.0661485	0.00161079	0.241505
Autumn	IP	0.0983011	0.0774599	0.0033864	0.291461		Autumn	IP	0.0957357	0.0812579	0.00409324	0.306707
Autumn	XI	0.0764003	0.0713648	0.00245663	0.266701		Autumn	XI	0.0370523	0.0282725	0.000908658	0.106514
Autumn	YI	0.147412	0.10019	0.00507569	0.354392		Autumn	YI	0.0249518	0.0204562	0.000928997	0.0736385
Autumn	CRI	0.385762	0.123534	0.174464	0.651417		Autumn	CRI	0.57196	0.116223	0.343237	0.785487
Autumn	OGA	0.149462	0.0871042	0.0132083	0.343415		Autumn	OGA	0.123429	0.0802655	0.00809899	0.294597
754bp specific feeding ground_no prior							754bp specific feeding ground_rookery size prior
Category	Source rookery	Mean	SD	Q02.5	Q97.5		Category	Source rookery	Mean	SD	Q02.5	Q97.5
East Sea	SWP	0.0687336	0.0627793	0.00200583	0.236156		East Sea	SWP	0.0710421	0.0687252	0.00224033	0.253276
East Sea	CWP	0.0708042	0.0630262	0.00199594	0.218049		East Sea	CWP	0.0692553	0.0630277	0.00191158	0.234751
East Sea	IP	0.204223	0.103838	0.0244718	0.419827		East Sea	IP	0.220974	0.129578	0.0209038	0.505501
East Sea	XI	0.0802345	0.0721418	0.00226747	0.275056		East Sea	XI	0.0375965	0.0316905	0.000833384	0.11442
East Sea	YI	0.178	0.100516	0.0226629	0.402788		East Sea	YI	0.0364195	0.0274521	0.0019204	0.101555
East Sea	CRI	0.207737	0.112381	0.0281788	0.465787		East Sea	CRI	0.338301	0.136127	0.0915891	0.626536
East Sea	OGA	0.190268	0.0821298	0.0602476	0.366363		East Sea	OGA	0.226411	0.103493	0.0697829	0.482423
South Sea	SWP	0.0811059	0.073052	0.00200668	0.259818		South Sea	SWP	0.0802087	0.0737649	0.00193397	0.274584
South Sea	CWP	0.0855177	0.0767887	0.00192599	0.287515		South Sea	CWP	0.0835555	0.0811898	0.00231402	0.310402
South Sea	IP	0.0771498	0.0682022	0.00217685	0.254438		South Sea	IP	0.0832536	0.0777237	0.00243967	0.290602
South Sea	XI	0.0817924	0.0727705	0.00228009	0.26841		South Sea	XI	0.0374865	0.0325202	0.00117728	0.119293
South Sea	YI	0.113818	0.0894386	0.00464372	0.330172		South Sea	YI	0.0253442	0.0238522	0.000674712	0.0894878
South Sea	CRI	0.324709	0.146661	0.061339	0.639216		South Sea	CRI	0.483235	0.151494	0.185185	0.768951
South Sea	OGA	0.235908	0.127126	0.0211854	0.526762		South Sea	OGA	0.206917	0.125603	0.0141384	0.486248
Jeju Sea	SWP	0.0813163	0.0740087	0.0022638	0.265759		Jeju Sea	SWP	0.0744043	0.0691973	0.00203751	0.258505
Jeju Sea	CWP	0.0784412	0.0693129	0.00279972	0.256795		Jeju Sea	CWP	0.0721383	0.0687001	0.00145489	0.245784
Jeju Sea	IP	0.0729962	0.0648265	0.00190205	0.251513		Jeju Sea	IP	0.0758833	0.0723649	0.00199194	0.273367
Jeju Sea	XI	0.0731114	0.0649203	0.00211503	0.241096		Jeju Sea	XI	0.0400623	0.0340251	0.000833921	0.121408
Jeju Sea	YI	0.168794	0.110684	0.0104448	0.423202		Jeju Sea	YI	0.0333272	0.0287626	0.000847842	0.105058
Jeju Sea	CRI	0.175109	0.109485	0.011993	0.411824		Jeju Sea	CRI	0.298374	0.131855	0.0673731	0.561314
Jeju Sea	OGA	0.350232	0.121454	0.152165	0.623792		Jeju Sea	OGA	0.405811	0.133911	0.178547	0.676485
